# Supplementary material for: Single-cell gain-of-function mapping reveals latent regulatory programs governing CD8+ T cell fate
Source: Research Square preprint supplement (doi:10.21203/rs.3.rs-9929244/v1), 2026-06-11
Supplement: Supplementary file 1 [file 2bf5f8dbb10358fafe697f21.xlsx]

## Sheet: Sheet1
Gene signature	Stemness	Terminal	Exhaustion	Cell cycle	Anergy	Stemnss	Exhaustion	Anergy	Terminal	TRM UP	HALLMARK_MYC_TARGETS_V2	Naive	Teff	Tem	Tmem	Texeff	TexKLR	Texprog	TexISG	Texint	TexTerm	Dysfunction	Cytotoxicity	TexTerm	TEX	TEX_UP	TEX_DOWN	TRM_UP	TRM_DOWN	TRM_UP	Naïve	Naïve	Trm	Teff	TRM_DOWN	TRM_UP	PretumorDriven_Pbased	TumorDriven_Tbased
Disease												LCMV	LCMV	LCMV	LCMV	LCMV	LCMV	LCMV	LCMV	LCMV	LCMV	Melanoma	Melanoma	LCMV	LCMV	LCMV	LCMV	LCMV	LCMV	LCMV	HCC	NSCLC	NSCLC	NSCLC	LCMV	LCMV	Eu-myc Tg	Eu-myc Tg
Year	2020	2020	2018	2013	2023	2009	2023	2023	2020	2025		2022	2022	2022	2022	2022	2022	2022	2022	2022	2022	2019	2019	2023	2020	2007	2007	2017	2017	2016	2018	2018	2018	2018	2025	2025	2014	2014
Journal	Immunity	Immunity	Immunity	NatImmunol	NetMed	BMCGenomics	NetMed	NetMed	Immunity	bioRxiv		NatImmunol	NatImmunol	NatImmunol	NatImmunol	NatImmunol	NatImmunol	NatImmunol	NatImmunol	NatImmunol	NatImmunol	Cell	Cell	JEM	NI	Immunity	Immunity	Nature	Nature	Science	NatMed	NatMed	NatMed	NatMed	bioRxiv	bioRxiv	Nature	Nature
First Author	Milner	Milner	Bengsch	Best	Chu	Assou	Chu	Chu	Milner	Chung		Daniel	Daniel	Daniel	Daniel	Daniel	Daniel	Daniel	Daniel	Daniel	Daniel	Li	Li	Kasmani	Utzschneider	Wherry	Wherry	Milner	Milner	Mackay	Chunhong	Guo	Guo	Guo	Chung	Chung	Sabo	Sabo
Last Author	Goldrath	Goldrath	Wherry	Goldrath	Linghua Wang	John DeVos	Linghua Wang	Linghua Wang	Goldrath	Kaech Wang		Satpathy	Satpathy	Satpathy	Satpathy	Satpathy	Satpathy	Satpathy	Satpathy	Satpathy	Satpathy	Amit	Amit	Cui	Kallies	Ahmed	Ahmed	Goldrath	Goldrath	van Gisbergen KP	Zemin Zhang		Zemin Zhang	Zemin Zhang	Kaech Wang	Kaech Wang	Mamaty	Mamaty
Reference	https://www.sciencedirect.com/science/article/pii/S1074761320301655?via%3Dihub	https://www.sciencedirect.com/science/article/pii/S1074761320301655?via%3Dihub	https://www.sciencedirect.com/science/article/pii/S107476131830195X?via%3Dihub	https://www.nature.com/articles/ni.2536	https://www.nature.com/articles/s41591-023-02371-y#MOESM3	https://link.springer.com/article/10.1186/1471-2164-10-10	https://www.nature.com/articles/s41591-023-02371-y#MOESM3	https://www.nature.com/articles/s41591-023-02371-y#MOESM3	https://www.sciencedirect.com/science/article/pii/S1074761320301655?via%3Dihub	https://www.biorxiv.org/content/10.1101/2023.01.03.522354v7	https://www.gsea-msigdb.org/gsea/msigdb/human/geneset/	https://www.nature.com/articles/s41590-022-01337-5	https://www.nature.com/articles/s41590-022-01337-5	https://www.nature.com/articles/s41590-022-01337-5	https://www.nature.com/articles/s41590-022-01337-5	https://www.nature.com/articles/s41590-022-01337-5	https://www.nature.com/articles/s41590-022-01337-5	https://www.nature.com/articles/s41590-022-01337-5	https://www.nature.com/articles/s41590-022-01337-5	https://www.nature.com/articles/s41590-022-01337-5	https://www.nature.com/articles/s41590-022-01337-5	https://doi.org/10.1016/j.cell.2018.11.043	https://doi.org/10.1016/j.cell.2018.11.043		https://www.nature.com/articles/s41590-020-0760-z	Wherry et al, Immunity 2007;27(4):670-84	Wherry et al, Immunity 2007;27(4):670-84	https://doi.org/10.1038/nature24993	https://doi.org/10.1038/nature24993	https://www.science.org/doi/10.1126/science.aad2035		https://www.nature.com/articles/s41591-018-0045-3	https://www.nature.com/articles/s41591-018-0045-3	https://www.nature.com/articles/s41591-018-0045-3	https://www.biorxiv.org/content/10.1101/2023.01.03.522354v7	https://www.biorxiv.org/content/10.1101/2023.01.03.522354v7
Members	2410002F23Rik	500009L16Rik	Abi3	Kif14	NT5E	AARS	PDCD1	NT5E	500009L16Rik	Irf4	AIMP2	Ccr7	Klrg1	Hbb-bs	Il7r	Xcl1	Cx3cr1	Id3	Isg15	Lgals3	Cd7	LAG3	PLAC8	CD7	IL18R1	1110006I15Rik	1110020B03Rik	2900026A02Rik	1700025G04Rik	Insig1	CCR7	CCR7	ZNF683	FGFBP2	Abtb2	Irf4	Cela3b	Ccdc135
	4833422C13Rik	1700020L24Rik	Abr	Aspm	IZUMO1R	AASS	LAYN	IZUMO1R	1700020L24Rik	Ehd1	BYSL	Sell	Ccr2	Klrb1c	Sidt1	Pclaf	S1pr5	Cxcl10	Ifit1	Hist1h2ap	Gzma	HVCR2	S1PR5	RGS1	IL18RAP	1110067D22Rik	1110038D17Rik	AA467197	2010012O05Rik	Gsg2	LEF1	SELL	CAPG	CX3CR1	Ly6c2	Ehd1	Amy2b	Igll1
	4930417O13Rik	2310031A07Rik	Acadl	2810417H13Rik	LAG3	ABCE1	HAVCR2	LAG3	2310031A07Rik	Xcl1	CBX3	Dapl1	Ly6c2	Kcnj8	Gpr183	Mif	Zeb2	Slamf6	Ifit3	Ube2c	Cd160	AKAP5	CX3CR1	CD3G	GM8210	1810035L17Rik	1810009A16Rik	Abcb1b	3110052M02Rik	Ddx3x	SELL	LEF1	ITGA1	FCGR3A	Prkcq	Xcl1	Try5	Gad1
	A630014C17Rik	2610318N02Rik	Ace	Nek2	NRP1	ABHD9	LAG3	NRP1	2610318N02Rik	Litaf	CDK4	Lef1	S100a10	Arl4c	Gzmm	Rrm2	Klre1	Ms4a4c	Usp18	Lgals1	Rgs1	PDCD1	FGFBP2	CD160	STAT1	1810054D07Rik	1810045K07Rik	Adam19	A430078G23Rik	Dhcr24	MAL	TCF7	STK17B	ADGRG1	Itgb1	Litaf	Fmn2	Amy2a5
	Actn1	4930579G24Rik	Irg1	Nuf2	DGKA	ACTA1	CD244	DGKA	4930579G24Rik	Dusp1	DCTPP1	Igfbp4	Itgax	Klrd1	Emb	Tuba1b	Klrc1	Ctla2a	Rsad2	S100a4	Fos	FAM3C	CD300A	AW112010	PMS1	2010100O12Rik	2010315L10Rik	Atf3	Acss1	Ppp1r16b	TCF7	RPL13	JUN	PLEK	Ccl5	Dusp1	Hspa1a	Prss2
	Aff3	5031425F14Rik	Acot11	Dtl	CBLB	ACTC	CTLA4	CBLB	5031425F14Rik	Jun	DDX18	Rps20	Vim	Itgb1	Gramd3	Hist1h2ae	Klf2	Rpl10	Isg20	S100a6	Dusp1	TNS3	FAM65B	ABI3	CTLA4	2510004L0Rik	2810024B22Rik	B4galnt4	Aff3	Klf6	LEF1-AS1	RPS6	ADAM19	FCGR3B	Hexb	Jun	Hspa1b	Ctrb1
	Apex1	Adamts14	Acsbg1	Cdc2a	RNF128	ACTN3	LILRB1	RNF128	Adamts14	Abi3	DUSP2	Tcf7	Dnajc15	Sgk1	Rpl29	Eif5a	Klrk1	Rpl41	Ifit3b	Anxa2	Trgv2	LYST	FCGR3A	ACTN2	ICOS	2700084L22Rik	2810404F18Rik	Bag3	Apobec2	Btg2	ACTN1	TXK	CKLF-CMTM1	KLRD1	Sh2d1a	Abi3	Tnfrsf19	2210010C04Rik
	Arhgap5	Adgrg1	Ada	4930547N16Rik	ITCH	ACVR2B	TIGIT	ITCH	Adgrg1	Cd69	EXOSC5	Rgs10	Pycard	Il18r1	Atp1a1	Tpi1	Rap1b	mt-Atp6	Bst2	Gm42031	Chn2	RDH10	KLRF1	CD3E	MAP2	5730469M10Rik	2810407C02Rik	Bhlhe40	Arhgap26	Cxcr6	CA6	RPL4	CKLF	S1PR1	Itga4	Cd69	Fhod3	Pnlip
	Armcx2	Anxa1	Adam19	Havcr2	NFATC2	ADAM19	TOX	NFATC2	Anxa1	Nfkbid	FARSA	Rpl36a	Anxa1	Txnip	Ier3	Hspd1	Il18rap	Gm11808	Phf11b	Crip1	Trbv4	PTMS	FGR	SH2D2A	IKZF2	9130009C22Rik	4833420G17Rik	Btg2	Arhgef18	Fosb	LDLRAP1	LDHB	CXCR3	LITAF	Lef1	Nfkbid	Capn5	Rgs7bp
	Arrdc4	Anxa4	Adam9	Spag5	EGR2	ADAM23	VSIR	EGR2	Anxa4	Gpr34	GNL3	Rps19	Tagln2	Tespa1	Rnf138	Ptma	Ahnak	Rpl9	Zbp1	Mki67	Ptger4	CXCL13	TGFBR3	ADGRG1	ARL4C	9130410M22Rik	6330406L22Rik	Btg3	Armc7	Jun	NELL2	NOSIP	XCL1	GZMH	Arhgef18	Gpr34	Slc25a13	Grm8
	Bach2	Arhgap33	Adamts9	Cdc6	EGR3	ADCY2	BTLA	EGR3	Arhgap33	Osgin1	GRWD1	Nsg2	Epsti1	Rara	Cxcr3	Ran	Klra9	Tnfsf8	Irf7	H2afx	Adgrg1	KIR2DL4	SPON2	RPS15A	GPC1	A430109M19Rik	A630038C17Rik	Ccl4	As3mt	Hspa5	TXK	RPL3	PELO	FCRL6	Klf2	Osgin1	Hspa12b	Cel
	Bcl2	Arsb	Emr4	Birc5	NR4A1	ADD2	ENTPD1	NR4A1	Arsb	Hspd1	HK2	Actn1	Jak1	Fcgr2b	Gpr132	Dut	Tbx21	Cd9	Samhd1	Pglyrp1	Jun	SNAP47	S1PR1	SHISA5	PDCD1	Adfp	Abce1	Cd244	Aven	Nedd4	MYC	EEF1G	CTSA	GNLY	Phf11b	Hspd1	Eps8l2	Gpnmb
	Bmyc	Aspm	Gpr56	Fignl1	TOB1	ADM	CD160	TOB1	Aspm	Itgae	HSPD1	Satb1	S1pr4	Gm45552	Rpl38	Ldha	Klf3	Crtam	Mx1	Ccnb2	Gzmk	CTLA4	C1orf21	LAX1	D1ERTD622E	Ai181996	Ablim1	Cd69	B3gnt5	Plk3	SERINC5	RPL32	PLTP	KLRG1	Tmem71	Itgae	Tmem132e	Sel1l3
	Bzw2	Baiap3	Adrbk2	Hmmr		ADNP	LAIR1		Baiap3	Ldlrad4	HSPE1	Gm26917	Abracl	Hid1	Lcn4	Pa2g4	Ifitm10	Ltb	Cmpk2	Cenpa	Cxcr6	IFNG	SORL1	PDCD1	TMEM37	Art3	Acadm	Cdh1	Bin2	Stard4	TRABD2A	EEF1A1	VIM	NKG7	Ms4a4b	Ldlrad4	Arpp21	Enpep
	C230085N15Rik	Capn2	Afmid	Brip1		ADSL			Capn2	Per1	IMP4	Rpl35	Cd47	S1pr1	Fam46a	Ranbp1	Emp3	mt-Nd3	Stat1	Rom1	Abi3	MIR155HG	C1orf162	CHN2	RGS1	Atf1	Acas2l	Chd7	Car5b	Tnfaip3	NOG	RPL5	PLP2	S1PR5	Glipr2	Per1	Nat8l	Ddn
	Ccdc91	Car5b	Agpat3	Prr11		AER61			Car5b	Gadd45b	IPO4	Rpl12	Itgb7	Gm2682	Rpl13a	Hnrnpab	Klra3	Icos	Ifit1bl1	Hist1h1e	Lax1	ENTPD1	PLEK	LAG3	1700025G04RIK	BC024955	Acp5	Chn2	Cdc14b	B4galnt4	SPINT2	LDLRAP1	SUSD3	PRF1	Rasa3	Gadd45b	D630045J12Rik	Lyz1
	Ccr7	Casp7	Ahi1	Top2a		AF020591			Casp7	Smim3	LAS1L	Rplp1	Gna15	Klhl6	Tecpr1	Npm1	Ccnd3	Traf1	Ifi209	Ywhah	Cd244	TNFRSF9	IL7R	PTGER4	RGS16	Bub1	Adcy7	Cish	Cmah	Cd244	RASGRP2	RPL19	CD69	PLAC8	Cxcr4	Smim3	Pde4c	Klk1
	Cd2ap	Ccl3	Aida	Kif18b		AFP			Ccl3	Fosb	MAP3K6	Rps8	Wdr95	Atp1b3	Sit1	Hmgb2	Itgb2	Inpp4b	Trim30a	Cdc25b	Ccl5	CD7	STK38	CXCR6	POGK	C330007P06Rik	Add1	Coq10b	D1Ertd622e	Hobit	C1orf162	SERINC5	GLUL	A2M	Acp5	Fosb	Rag1	Cdkn2b
	Chst15	Ccl4	Ak3	Rrm2		AGL			Ccl4	Nr4a1	MCM4	Rps24	Lsp1	Atp2b1	Tob1	C1qbp	Ctsd	Zfp36l1	Ly6a	Tuba1c	Serpina3g	DGKH	SELL	FASL	TAGLN2	C79248	Adh5	Cpd	Dapl1	Irf4	NT5E	LRRC75A-AS1	S100A11	ZEB2	Abhd8	Nr4a1	Cecr2	Eml1
	Cpq	Ccl5	Akr1b8	Ncapg2		AGPS			Ccl5	Fosl2	MCM5	Ighm	Snx5	Tnfrsf25	H2-Ke6	Srm	Borcs7	Ddit4	Igtp	Hist1h1d	Cd3g	CD27	BIN2	GZMK	AIM2	Capzb	Akap8	Crem	Dennd2d	Cish	RCAN3	RPS4X	ZYX	FGR	Txk	Fosl2	Mei4	Cd8b1
	Cxxc5	Ccl9	Akr1e1	C79407		AK3			Ccl9	Ifng	MPHOSPH10	Rps28	S100a13	Zfp36l2	Fam46c	Hsp90ab1	Rasgrp2	Rpl35a	Rtp4	Gm4316	Sept4	RAB27A	SAMD3	TIGIT	IFI213	Car2	Al325941	Ctla4	Dgka	Mapkapk3	VIPR1	MYC	CISH	PXN	Klf3	Ifng	Rcor2	Ptprf
	Dapl1	Cd244	Alcam	Hist1h3g		AKAP1			Cd244	Hilpda	MRTO4	Rpl13	Gmfg	Tnfaip8l2	Bola2	Tnfrsf9	Spn	Arap2	Daxx	Actg1	Actn2	TNFRSF1B	EMP3	ARL6IP1	EPHX1	Casp3	Al447904	Dennd4a	Dnahc8	Sik1	NOSIP	RPL11	XCL2	CST7	Tcf7	Hilpda	Nt5dc2	Sparc
	Dctd	Cd48	Alox5ap	Hist1h2bm		ALDH7A1			Cd48	Cxcr6	MYBBP1A	Rps26	Itga4	St3gal6	Gm35037	Stmn1	Bhlhe40	2310001H17Rik	Ifi47	Slc27a4	Nedd9	ITGAE	ARL4C	CCL4	DTL	Casp4	Anapc5	Dgat1	Dock5	Pygl	EPHX2	RPS13	SOCS1	EFHD2	Fam49a	Cxcr6	Snora15	Cd3g
	Ddc	Cdk1	Als2	Hist1h2be		ALPL			Cdk1	Isg20	MYC	Evl	Anxa6	Acss2	Rcn3	Srsf2	Txndc5	Cd28	Lgals3bp	Prr5l	Fasl	PHLDA1	EFHD2	PRKCH	HSD11B1	Ccl3	Arbp	Dnaja1	Dusp7	Ctnna1	CD248	RPL31	PFKFB3	PRSS23	Sidt1	Isg20	Gcat	Spp1
	Dusp10	Cdkn1a	Ank3	RP23-38E20.1		AMD1			Cdkn1a	Klf6	NDUFAF4	Rpl8	Arhgdib	Rora	Cd44	Fabp5	Tubb3	Asap1	Gbp9	Myo1g	Abcb9	PAG1	KLRB1	ABCB9	PERP	Ccl4	Arhgap1	Dnaja4	Ehd3	Odc1	BACH2	RPS18	FAM129A	KLF2	Kcnn4	Klf6	Celsr2	Rsph1
	Egr2	Chn2	Anxa3	RP23-38E20.1		AMMECR1			Chn2	Rgs2	NIP7	Rps7	Cd8b1	Cited2	Trbv13-3	Hsp90aa1	Snx10	Tnfrsf4	Trafd1	Calm1	Cela1	CSF1	TRDC	TRBC2	SGK1	Ccrl2	Arhgef1	Dnajb1	Elovl7	Per1	LRRN3	EEF1B2	SMG1P3	TGFBR3	S1pr1	Rgs2	Cd24a	Satb2
	Elovl6	Chsy1	Apaf1	RP23-38E20.1		ANAPC1			Chsy1	Ppp1r16b	NOC4L	Eef1b2	Actb	Xrn2	Grap	Fbl	Hopx	mt-Nd4	Ifi203	Hist1h2ab	Ppp1r15a	CCL3	KLRG1	PSMB8	DSE	Cd160	Ascc1	Dnajb4	Eomes	Dusp1	IGF1R	RPL34	SLC7A5P2	SYNE1	Atp1b3	Ppp1r16b	Cplx2	Lyz2
	Fhit	Cit	Aplp2	Hist1h3g		ANK2			Cit	Inpp4b	NOLC1	Rpl10-ps3	Gabarapl2	Mpnd	Tmem154	Ncl	Cdkn2d	1700019D03Rik	Ifi27l2a	Dnajc9	Trbc2	GBP2	FCRL6	SERPINA3G	GM5424	Cd244	Atp6v0a2	Dnajb6	F2rl2	Atf3	THEM4	PRKCQ-AS1	SKIL	FLNA	AB124611	Inpp4b	Capn11	Fam50b
	Filip1l	Clspn	Apobec2	Hist1h3g		ANKHD1			Clspn	Nr4a2	NOP16	Rgcc	Cd52	Ywhaq	Wfikkn2	Mcm3	Zyx	Nfkbia	Oas1a	Cenpf	Junb	MYO7A	CCND3	CD8A	GZMM	Cd7	Atp6v0b	Dusp1	Fam49a	Ldl rad4	TMEM204	RPS12	PTGER4	BIN2	Mpnd	Nr4a2	Arvcf	Gal3st1
	Gabrr2	Cpne7	Apoc2	Hist1h2bb		ANKRD10			Cpne7	Atf3	NOP2	Rpl28	Ctla2b	Slco3a1	Dennd4c	Hmgn2	Capn2	Slfn5	Gbp2	Prex1	AC163354.1	GALNT1	GNLY	PGLYRP2	ATCAY	Cd9	B230114J08Rik	Dusp4	Fam53b	Sc4mol	CD55	RPS14	GCHFR	PATL2	S1pr5	Atf3	Prtg	Nrxn1
	Gas5	Crat	Areg	Hist1h2ab		AP1M2			Crat	Zfp36	NOP56	Rps4x	Glipr2	Armc7	Dennd4a	Eif4a1	Smpdl3b	Pou2f2	Ifih1	Nusap1	5830405F06Rik			NEDD9	GNA15	Chl1	Bat1a	Dusp6	Fam65b	Junb	FAM117B	SNORA33	PLXDC1	LILRB1	Lcn4	Zfp36	Stmn1	Cyp46a1
	Gdap10	Ctsd	Arhgef12	Hist1h3f		AP1S2			Ctsd	Neurl3	NPM1	Rflnb	Sike1	A430078G23Rik	Faah	Lmnb1	Apbb1ip	Hif1a	Phf11a	Nccrp1	Gimap7			APOL7E	ELK3	Cit	Bnip3l	Egr1	Fgf13	Gpr56	DGKA	RIPOR2	BTG1	TBX21	Aff3	Neurl3	Snora70	Scn3a
	Gm14085	Cx3cr1	Arid3a	Hist1h4b		APBB2			Cx3cr1	Dusp5	PA2G4	Rpl10a	Ostf1	Ankrd11	Clip1	Tk1	Lfng	mt-Co3	Parp9	Hist1h2af	Cd200r1			PADI2	IFNG	Coch	Bzw1	Ehd1	Flna	Nfkbid	PDE3B	RPS23	GOLGA8A	TARP	Bin2	Dusp5	Prdm5	Cd4
	Gm16150	Dapk2	Arl5a	Hist1h1a		APEX1			Dapk2	Fos	PES1	Il6ra	Atp5h	Arhgap26	Reck	Mcm5	Selplg	mt-Co1	Ifi213	Prc1	Gm28942			ADAM19	STAT2	Cpa3	C79468	Ell2	Gab3	Fosl2	TMEM123	RPS5	USP20	MYO1F	Dgka	Fos	Mex3a	Slc1a4
	Gm16151	Dennd5a	Armcx3	Cenpk		API5			Dennd5a	Traf4	PHB1	Dgka	Tmsb4x	Emp1	Sntb2	Cycs	Nptn	Cxcr5	Herc6	Paqr4	Cd38			PDE7A	ZNRF3	Cpsf2	Cct3	Fasl	Gm11435	Rgs2	ABLIM1	LRRC75A	PLEC	ITGB2	Flna	Traf4	Ltbp4	Hist2h3c1
	Gm16152	Dgkh	Arsb	RP23-38E20.1		APPBP1			Dgkh	Skil	PLK1	Rpl23	H2afy	AI467606		Snrpd1	Cd48	Ccr6	Xaf1	Zbtb32	Trbv14			CD38	LGALSL	Cpt2	Cct4	Fbxo30	Gramd4	Nr4a2	LDHB	RPL14		UCP2	Kbtbd11	Skil	Maoa	Egfl6
	Gm17072	Dock5	Art3	Hist1h4b		ARF3			Dock5	Junb	PLK4	Pik3ip1	Myl6	Krtcap2		Anp32b	Rasa3	Dennd2d	Tgtp2	H2afv	Rgs3			TAPBPL	VPS54	Crygb	Cct5	Fgl2	Gzmm	Dgat1	STMN3	RPL18		C1orf21	Klrg1	Junb	Atp10a	Sh3bp4
	Gm17169	E2f7	Asap2	Hist1h2ak		ARFGEF1			E2f7	Gpr171	PPAN	Rps16	Supt4a	Neat1		Set	As3mt	Rpl22l1	Gbp7	Kremen2	Apol7e			RGS3	UBLCP1	Ctla4	Cct8	Fmnl3	Haao	Arrdc3	PRKCQ-AS1	TRABD2A		PYHIN1	Traf3ip3	Gpr171	9430020K01Rik	Csf2rb2
	Gm20696	E2f8	Asprv1	Hist1h1b		ARHGAP19			E2f8	Vps37b	PPRC1	Rpl15	Sh3bgrl3	Gm44174		Gapdh	Zmiz1	Rpl17	Mndal	Serpinb9	Cish			ISG15	GALNT10	Cxcl10	Cd1d1	Fos	Icam2	Frmd4b	FAM102A	RPLP0		SPON2	Zeb2	Vps37b	Palm	Prkch
	Gm26551	Emilin2	Atmin	Hist1h3g		ARHGAP8			Emilin2	Tnfrsf1b	PRMT3	Rps29	Mrpl33	Stk38		Nap1l1	Ccnd2	Tspan3	Gbp4	Agpat3	Fgl2			FGL2	GM12250	D15Ertd781e	Clk2	Fosl2	Il17ra	Nr4a1	PASK	TMEM123		PZP		Tnfrsf1b	Akap12	Alas2
	Gm26583	Emp1	Atp6v0a1	Hist1h4m		ARL8			Emp1	Tnf	PUS1	Cmah	Coro1a	Fam105a		Birc5	Reep5	mt-Co2	Ddx58	Hist1h2ak	Pglyrp2			GLRX	HS3ST3B1	D8Ertd531e	Cmah	Gabarapl1	Il18rap	Gpr171	CAMK4	RPS9		ADRB2		Tnf	Diras2	3425401B19Rik
	Gm34006	Entpd1	Atp8a2	Hist1h4f		ARNTL2			Entpd1	Tigit	RABEPK	Rplp0	Arpc5	Ptpn6		Phgdh	Racgap1	Kcnn4	Jaml	Arsb	2900026A02Rik			FYN	SLC16A11	Dock7	Crlf3	Gadd45b	Kbtbd11	Smim3	OXNAD1	RPL13A		PXN-AS1		Tigit	Eps8	LOC100499420
	Gm34727	Epas1	Atpif1	Hist1h3f		ASC			Epas1	Tgif1	RCL1	Rpsa	Gm2a	Il17ra		Nhp2	Flna	Cd200	Eif2ak2	Cenpe	Adam19			NR4A2	XAF1	Entpd1	D10Wsu52e	Gem	Kcnj8	Eya2	TNFSF8	PABPC1		LAIR2		Tgif1	Uchl1	Cd3d
	Gm36931	Ern1	Atxn1	Hist1h2bc		ASE-1			Ern1	Ssbp2	RRP12	Rps5	Hsd11b1	Dtx1		Erh	Atp2a3	Adk	Tor3a	Dap	Trbv3			STK17B	ABHD15	Eomes	D14Wsu123e	Glrx	Klf2	Gpr55	TMEM63A	ABLIM1		ITGAL		Ssbp2	Depdc1b	4933436C20Rik
	Gm38057	Esm1	B4galt4	Hist1h3f		ASML3B			Esm1	Rrad	RRP9	Tmsb10	1810058I24Rik	Mylip		Nme1	Nfic	Ptpn11	Slfn1	Calm3	Glrx			IL21R	VMP1	Eomes	Dgka	Gpr171	Klhdc1	Amica1	AIF1	RPS3		APMAP		Rrad	Kcnk1	Ryr2
	Gnl3	F2rl2	Bank1	Hist1h4b		ASPM			F2rl2	Rgs16	SLC19A1	Sh3bp5	Apobec2	Sema4a		Pgam1	Plec	Tspan32	Pml	Clic1	Cd3e			LAT	MMD	Etf1	Dtx1	Gpr56	Klrb1c	Ly6g5b	GPR183	MAL		CTSW		Rgs16	Gmnn	Tmem176b
	Gpatch4	Fam83d	Bhlhe41	Hist1h3a		ASS			Fam83d	Rgs1	SLC29A2	Tmem108	Ap2s1	Gm26740		Hist1h1b	Laptm5	Gpr18	Socs1	Anxa5	Prkch			WBP1	TOB1	G1p2	Eef2	Gzmb	Klrg1	Cs rnp1	C1orf228	TPT1		HLA-C		Rgs1	Dhfr	Stox2
	H2-Oa	Fasl	Blnk	Trip13		ATE1			Fasl	Pdcd1	SORD	Foxp1	Psmd8	Ripor2		Tubb5	Lpin1	Ehd3	Slfn8	Cdc42	Tcrg-C2			GZMB	WFIKKN2	Gcin	Eif2s1	H3f3b	Lair1	Traf4	RPS8	RPLP2		TTC38		Pdcd1	Cdca5	Svep1
	H2-Ob	Fbxl2	Btk	Cenph		ATIC			Fbxl2	Nr4a3	SRM	mt-Nd4l	Ppp1ca	Rabac1		Ppa1	Thy1	Sh2d1a	Rnf213	Kif22	Vmp1			CBX4	IKZF3	Gdf3	Ephb4	Havcr2	Lfng	Zfp36	GLTSCR2	RPL10A		FCRL3		Nr4a3	Zfp521	Olfml2b
	Hcn3	Fcer1g	1810011H11Rik	Ccnb1		ATP1A2			Fcer1g	Nfil3	SUPV3L1	Gm10076	Fcgrt	Ppp1r12a		Rps17	Tmem37	mt-Nd1	Ifi35	Tpm3	Mxd4			SERPINB6B	NR1D1	Gp49b	Erdr1	Hip1	Limd1	Glrx	LRRC75A	DGKA		EMP3		Nfil3	Ccdc141	Atp1a3
	Id3	Fcgr2b	1700034J05Rik	Dlgap5		ATP1B3			Fcgr2b	Itga1	TBRG4	Rps18	Atox1	Malat1		Mcm6	Ifngr1	Nek7	Dhx58	Gnai2	Car2			PTPN18	RARA	Gpd2	Ets1	Hpgds	Lpin1	Dusp5	PIK3IP1	RPL12		ADD3		Itga1	Idh2	Bsn
	Igf1r	Fhl2	BC028528	F630043A04Rik		ATXN7L1			Fhl2	Isy1	TCOF1	Rps27a	Arpc5l	Rap2b		Tubb4b	Ccdc88c	Lars2	Parp14	Pfn1	Trac			TRAC	CCR7	Gpr56	Fkbp4	Hsp90aa1	Ly9	Litaf	FOXP1	RPLP1		ZEB2-AS1		Isy1	Ahnak	Crmp1
	Ighd	Gab2	C5ar1	Esco2		AURKB			Gab2	Il21r	TFB2M	Rapgef6	Arpc3	Sun2		Nop58	Cyth4	Trbv1	Ube2l6	Vasp	Irf1			PFDN5	DHX58	Gpr65	Gm2a	Hspa5	Mboat1	Gadd45b	GCSAM	RPS14P3		RAP1B		Il21r	Fstl1	Airn
	Igsf6	Ggh	9130008F23Rik	C330027C09Rik		AUTS2			Ggh	Icos	TMEM97	Rpl5	Esm1	Ctdsp1		Hspe1	Id2	Spock2	Plac8	Cdk6	Fosb			GM14029	SMURF2	Icsbp1	Gnb2-rs1	Icos	Ms4a4c	Ifng	SNED1	RPS20		CYTH1		Icos	Nav2	Ifi44
	Iigp1	Gm11573	3110062M04Rik	Uhrf1		B3GAT1			Gm11573	Hsp90aa1	UNG	Rpl9-ps6	Mtpn	Arhgap45		Impdh2	1700025G04Rik	Tnfaip8	Gbp6	Crmp1	Arl6ip1			CD164	AXIN2	Ier5	Gtf2i	Ifng	Nck2	Osgin1	APBA2	RPL30		RASSF1		Hsp90aa1	Anp32e	Atp8b4
	Il4ra	Gm14005	Cacna1e	Ccnf		B3GNT7			Gm14005	Gzmb	UTP20	Rps10	Dynlt1b	Slc9a9		Slc25a5	Plek	Art3	Ehd4	Fkbp5	Padi2			MBNL1	HID1	Isg20	Hcph	Ifrd1	Nfatc3	Abi3	LMO7	RPS3A		TPST2		Gzmb	Cenph	Ggnbp1
	Il6st	Gm15232	Calca	Kif20a		BAT1			Gm15232	Gem	WDR43	mt-Atp8	Arl5c	Tcf3		Top2a	Adgre5	Aff3	Ifi214	Serp2	Klf6			VMP1	RHBDF2	Itgav	Hexa	Il21r	Nod1	8430419L09Rik	LINC01550	RPL10		MTSS1		Gem	Nusap1	Igfbp4
	Il7r	Gm16085	Camp	Cdca5		BAX			Gm16085	Fgl2	WDR74	mt-Cytb	Riox2	Nfatc3		Ccna2	Arl6ip5	Ifnar2	Tgtp1	Klf10	Cd200r2			CCL3	SEC14L1	Jak3	Hmgcs1	Il4ra	Nsg2	Egr1	ATM	RPL8		TSPAN32		Fgl2	2900026A02Rik	Il33
	Inpp4b	Gm17055	Casp1	Kif11		BCAT1			Gm17055	Fasl		Rplp2	Ptprc	Pea15a		Ube2s	Kcnab2	Etv6	Gzmb	Ywhaz	Sipa1			CD27	KLF11	Kdt1	Hspa8	Inpp4b	Pde2a	Hilpda	FKBP5	NPM1		RAP2B		Fasl	Tiam1	Celsr1
	Inpp5a	Gm26628	Casp3	Cep55		BCCIP			Gm26628	Dnajb4		Rps3a1	Rsrp1	Rnpepl1		Nutf2	Atg4d	Oasl2	Ifi206	Cdkn3	Efhd2			PDE4B	RNF144A	Klk6	Iap	Irf4	Pion	Skil	LRRC75A-AS1	RPL37		RASA3		Dnajb4	Fbxo5	Epha2
	Ipo4	Gm36981	Casp4	Arhgap19		BCL2L12			Gm36981	Dnajb1		Kbtbd11	Acot7	Hcst		Mrto4	Bin2	Clec2i	Naa20	Arpc4	Ucp2			CCR5	RSAD2	Lag3	Iap(II-3)	Isg20	Prss12	Rnf149	CEP68	RPS19		ITGAM		Dnajb1	1700001O22Rik	Car12
	Klhl3	Gm37691	Ccdc109b	Bub1b		BCOR			Gm37691	Dnaja4		Rpl32	Cib1	Pik3r5		Mcm7	Cyba	Gm42418	H2-T22	Hist1h3e	Cd200r4			ARHGAP9	CMPK2	Lman2	Iap11-1	Isy1	Prune	Hmgcs1	RIC3	RPL36		MYO1G		Dnaja4	2810417H13Rik	Chdh
	Lrp12	Gm6637	Ccdc112	Casc5		BICD1			Gm6637	Ctla4		Rpl18	Smdt1	Atp8b4		Pgk1	Slamf7	Nab1	Lgals9	Actr3	Gm14029			CST7	ENTPD5	MKi67	Icam2	Itga1	Pycard	P4hb	GPR155	RPSAP58		CD47		Ctla4	A130040M12Rik	Hesx1
	Lypd6b	Gm8818	Ccdc146	Rad51		BIRC5			Gm8818	Crem		Rps15	Myl12a	Cirbp		Tyms	Cmpk1	Tbc1d4	Irgm1	Pim1	Trbv12-2			DTX1	JDP2	Mox2	Ifnar1	Jun	Qprt	Pnrc1	PLEKHB1	FOXP1		C12orf75		Crem	Prkar2b	Usp44
	Map7	Gtse1	Ccdc66	Nusap1		BLM			Gtse1	Cpd		mt-Nd5	Gnb2	Crybg1		Gar1	Tm6sf1	Ptp4a2	Dtx3l	Rad21	Chst12			PSME1	BATF	Mtv43	Il17r	Junb	Rap1gap2	Gpr34	ARHGEF18	RPL29		SAMD3		Cpd	Nes	Ddr1
	Mcoln3	Gzma	Ccdc88a	Tpx2		BM039			Gzma	Coq10b		Rpl39	Ap3s1	Arl2bp		Tkt	Tmem163	Zc3h12d	Oasl1	Hist1h4d	Prrt1			LCP2	TMEM251	Myh4	Il17r	Kdm6b	Rasa3	Ppp1r15a	MAML2	RPS21		RAP1GAP2		Coq10b	Nme4	Slco4a1
	Mdn1	Gzmb	Ccnyl1	Mastl		BMP2K			Gzmb	Chn2		Rpl21	Twf2	Add3		Ybx1	Prr13	Pim2	Stat2	Capzb	Fyn			TOX	IFI27L2A	NDfip1	Itgb7	Litaf	Rasgrp2	Itgae	NPM1	SATB1		MYOM2		Chn2	Ccnb1	Vegfa
	Metap1d	Havcr2	Ccrl2	Spc25		BMP7			Havcr2	Ccl4		Uba52	Nop53	Macf1		Banf1	Iqgap2	Smpdl3a	Ifit2	Hexb	Wbp1			SEC11C	SERPINA3F	Nftac1	Jmjd1a	Lmnb1	Rgs19	P2 ry10	GAS5	RPS10		PFN1		Ccl4	Cdkn2a	1110032F04Rik
	Mettl1	Heatr9	Cd14	Arhgap11a		BMPR1A			Heatr9	Btg3		Rps12	Eef2	Usp48		Rps27l	Rap1gap2	Camk2d	Zufsp	Bex3	Dapk2			FOXN3	SERPINA3G	Nptxr	Kcnn4	Ly6g5b	S1pr1	Ehd1	EIF3L	RPS25		SPN		Btg3	Snora68	Echdc2
	Mlh3	Hist1h1b	Cd19	Bub1		BOMB			Hist1h1b	Bhlhe40		Tdrp	Eif4e2	Fam204a		Nme2	H2-Q7	Psen2	Tapbp	Kif23	Tapbpl			GIMAP7	AKR1E1	Nr4a2	Kctd10	Mxd1	S1pr4	Dusp6	EIF3E	NELL2		ITGA4		Bhlhe40	Cdk1	Antxr1
	Mob3b	Hist1h1d	Cd200r1	Hist2h3c1		BOP1			Hist1h1d	Bag3		Treml2	Tmem234	Ier5		Hnrnpa1	Psap	Vps13a	Aftph	Stk32c	Hic1			EFHD2	KLF6	Nr4a2	Klf13	Mxi1	Samd3	Xcl1	MLXIP	RPL37A		SLC9A3R1		Bag3	Ehd2	Mfge8
	Myc	Hist1h1e	Cd200r2	Hist2h3b		BRAF			Hist1h1e	Abcb1b		Rpl37	Glud1	Tmem109		Cks1b	Ube2g2	P2rx7	Smchd1	Syt11	Rcn1			NFATC1	IRF4	Pawr	Klf2	Neurl3	Sell	Spsb1	NDFIP1	RPS2		LPCAT1		Abcb1b	Fam64a	Asns
	Nme4	Hpse	Cd200r4	Cenpe		BRIX			Hpse	AA467197		Rps6	Rac2	Sfxn3		Dctpp1	Tmem71	Map4k4	Oas3	Hist1h2ai	Gem			RCN1	NFIL3	Pbx3	Klf3	Nfil3	Sfxn3	Isg20	RACK1	RPS16		USP28		AA467197	Pde2a	Prelid2
	Nsg2	I830127L07Rik	Cd24a	Depdc1a		BRRN1			I830127L07Rik			Ssh2	Mrpl58	Btg2		Rrm1	Vopp1	Gm20400	Il10ra	Ywhab	Prdx5			RNASET2B	SERINC5	Pdcd1	Klf3	Nfkbie	Sh2d1a	Inpp4b	SH3YL1	RPL22		SH3BP5			Hdgf	Egfl7
	Oas2	Ica1	Cd244	Ect2		BST2			Ica1			mt-Nd2	Polr1d	Smap1		Atp5g3	Fxyd5	Igkc	Psmb10	E2f2	Tnfaip3			PLA2G16	NAIP2	Penk1	Lbr	Nr4a1	Sh3bp5	Neu rl3	TPCN1	CD55		CD99			Cdca3	2310033E01Rik
	Oasl2	Il10ra	Cd300ld	Ccna2		BUB1			Il10ra			Pdk1	Srp19	Itgal		Cct5	Calm2	Cpne3	Ms4a4b	Lrrfip1	Gng2			CISH	ELOVL7	Plscr1	Lef1	Nr4a2	Sidt1	Hpgds	PSIP1	TXNIP		SLC44A2			Gas2l3	Smtn
	Pacsin1	Il18rap	Cd302	Cks1b		BUB1B			Il18rap			Pdlim1	Sec61b	D1Ertd622e		Atp5b	Slc44a2	Sat1	Trim30d	Eml3	Arhgap9			PSMB10	SH3BP5	Pon2	LOC280487	Nr4a3	Sike1	Rhob	C6orf48	RACK1		SLAMF7			Kif11	Gm10451
	Patj	Incenp	Cd36	Ccne2		BUB3			Incenp			Rps9	Arpc2	Slc20a1		Lig1	Arhgef3	Mrpl52	Parp12	Mxd3	Dusp6			CD3D	PTGER2	Prkwnk1	LOC381438	Ntan1	Slamf6	Vdac1	ZNF101	RPS27A		PTP4A2			Ptgr1	Fam70a
	Pcbp3	Itga2	Cd38	Stil		BXDC1			Itga2			Rpl6	Dock2	Prkcq		Pkm	Tpst2	Itm2c	Mov10	Hist1h3i	Serpinb6b			COX8A	LGALS3	Ptger2	Macf1	Odc1	Smpdl3b	Lad1	SCML4	LOC100289511		CCND3			Cep55	Padi4
	Pecam1	Itgam	Cd7	Clspn		BZW1			Itgam			Rpl22	Myo1f	Chd7		Pcbp1	Nipal3	Spint2	Ly6e	Cdkn2c	Glcci1			CCL5	ABHD4	Ptger4	Map4k4	P2ry10	Spn	Fos	APEX1	RPL15		RAB29			Pa2g4	Shank2
	Polr1b	Itgb2	Cd80	Stmn1		C10orf18			Itgb2			Tsc22d3	Gng10	Arhgef2		Rps2	H2-Q6	Sesn3	Gbp10	Pqlc3	Tap2			MXD4	PCK2	Ptpn13	Mapk8	P4hb	St3gal1	Cdh1	EEF2	RPL6		PIK3R5			Spc25	Stac
	Pou2af1	Kcnj8	Cd81	Hmgb2		C10orf89			Kcnj8			Rpl30	H3f3a	Kpna4		Tcp1	Spata13	Lysmd2	Gbp3	Wdr1	Gngt2			TAP2	CYSLTR2	Rcn	Mat2a	Pdcd1	Stard10	Cd69	R3HDM4	NDFIP1		CEP78			Snora21	Trhr2
	Rapgef4	Klf12	Cd83	Stmn1		C11orf23			Klf12			Rpl3	Stk24	Stat4		Lsm2	Rap2a	Cd84	Cd274	Hist1h1c	Entpd1			ITM2B	DNAJC15	Rgs16	Nfe2l2	Per1	Tcf7	Qpct	TOMM7	RPS29		ARHGAP25			Gsto1	Steap3
	Rgs10	Klra3	Cd86	Rad54l		C11orf73			Klra3			Limd2	Ten1	Cdk2ap2		Mcm2	P3h4	Samd3	Iigp1	Arhgdia	Akna			PNRC1	RGCC	Rnf11	Nme2	Plk3	Tlr1	Hspd1	PDK1	FCMR		RAB37			Nasp	Dhcr24
	Rpgrip1	Klre1	Cdc14a	Kif2c		C11orf82			Klre1			Rack1	Cox4i1	Rsu1		H2afz	Msn	Bmyc	Ccrl2	Cnn2	Mfsd10			AKNA	GPR183	S100a13	Numb	Plscr1	Tmem71		TRAP1	RPSA		SH3BP5-AS1			Npc2	Pipox
	Rpp40	Klrg1	Cdk14	Ccnb1		C12orf11			Klrg1			Ramp1	Mrps16	Jpt1		Pcna	St3gal4	Aes	Pttg1	1700097N02Rik	Ifi27			ID2	CLYBL	45904	Osbpl11	Pmepa1	Tnfrsf26		NPAT	ACTN1		OSBPL5			Rexo2	Ccr9
	Satb1	L1cam	Cdk6	Cdca8		C13orf7			L1cam			Foxo1	Kxd1	Tax1bp1		Ppia	Crip2	AC149090.1	Ifi208	Gltp	Pfdn5			ITK	IL7R	Serpina3g	Pak2	Ppp1r15a	Traf3ip3		SMAP2	PIK3IP1		LINC00612			Crip1	Xist
	Sell	Lamc1	Cdkn2c	Hmgb2		C14orf104			Lamc1			Selenop	Txndc17	Icam2		Nolc1	AB124611	Hgsnat	Phf11c	Ezr	Rps6ka1			GM12216	OTULINL	Sh2d2a	Pdha1	Prdx6	Ubxn2b		WDR43	RPS8		CYBA			Sema3g	Plxdc1
	Sesn3	Lat2	Ceacam1	Hmgb2		C14orf106			Lat2			Rps3	Esd	Il12rb2		Timm8a1	Ier2	Kcnq1ot1	1600014C10Rik	Nfyb	Cebpb			IRF1	TRPS1	Shkbp1	Pdlim1	Ptp4a1	Usp33		SPTBN1	RPL24		SUN2			Snora33	Arhgap29
	Sh3bp5	Lgals1	Cela1	Tacc3		C14orf115			Lgals1			Ssbp2	Nt5c	Ctsw		Psat1	Map7d1	Gm8369	Tap1	Lockd	Bcl2			LCP1	LY6C1	Snrpb2	Pik3cd	Qpct	Ypel1		COQ8A	RPL35A		PLEKHG3			Rrm1	Tln2
	Slc6a19	Lgals3	Cenpq	Ncapg		C14orf94			Lgals3			Rpl36	Ppib	B4galt1		Phb	Stard10	Rab37	Shisa5	Bak1	Pvrig			IKZF1	LY6C2	Spock2	Pld3	Rbpj	Zeb2		ARHGAP45	GAS5		SYTL1			Hist1h2be	Slc7a5
	Slfn5	Med12l	Cep128	Kntc1		C15orf15			Med12l			Rps21	Trbv15	Cdc42ep3		Tfdp1	Cmklr1	Tle3	Chmp4b	Ngly1	Pstpip1			PTPN22	NAPRT	Spp1	Ppp2r5a	Rgs1	Zfp595		BEX4	THEM4		TTC16			Incenp	Itk
	Snhg12	Metrnl	Cers6	Mad2l1		C16orf34			Metrnl			Peli1	Ilk	Ccdc85b		Atp5g1	Card19	Ar	Ddx60	Lbr	Tnfrsf1a			SIPA1	KCTD17	Sybl1	Prps1	Rgs10	Zfp760		UBQLN2	ATM		LOC100130872			Nolc1	Grip1
	Socs5	Mrgpre	Cggbp1	Cdca3		C1QBP			Mrgpre			Rpl31	AA467197	Mbp		Hspa8	Dusp5	Dguok	H2-T23	Fmnl1	Pnrc1			LITAF	CBX6	Tank	Prss19	Rgs16			TRMT1	RPL23		CYTH4			Myb	Ryk
	Ssbp2	Msc	Chit1	Prc1		C1QDC1			Msc			Rpl26	Msrb1	Gprin3		Eif3b	Sdcbp	Gm30211	Trim12c	Gas7	Rnaset2b			GPR65	GXYLT1	Tcea2	Pscdbp	Rhob			SNURF	RPS10-NUDT3		PRKCB			Snora64	Ankle1
	St8sia1	Mt1	Chn2	Plk1		C1orf108			Mt1			Rps27	Tram1	Tprgl		Ahcy	Pogk	Eml4	Clic4	Ak3	Runx3			VPS37B	SLC11A2	Tcrb-V13	Ptk9l	Rnf149			FAM60A	FLT3LG		VCL			Tcfap4	Galnt14
	Tcf7	Mt2	Chst11	Ccnb1		C1orf121			Mt2			Scml4	Ggh	Dpm3		Nasp	Lamb3	Eif3e	BC147527	Rhoa	Ptpn18			UBAC2	GRASP	Tcrg-V4	Rap1gds1	Rrad			SGSM3	SRSF5		ITGB1			Cbx2	Hist1h2an
	Tdrp	Ncald	Chst12	E2f8		C1orf163			Ncald			Crlf3	Psmb1	Ly9		Gmnn	F2rl2	Mgst2	Apobec3	Oaz1	Dusp2			ZAP70	LITAF	Tcrg-V4	Rnpc1	Sik1			ITFG2	PIM2		CD52			Sfxn1	Tcam1
	Tfap4	Ncaph	Chst2	Depdc1a		C1orf38			Ncaph			Rpl18a	Itga1	Esyt1		Mybbp1a	Sept11	Dap3	Nmi	Fam107b	Stk17b			STARD3NL	RTP4	Tnfrsf1a	Rpl10	Skil			EXOSC8	SNHG8		DOK2			Rtkn2	Sox8
	Thada	Ndc80	Cib2	Mki67		C20orf129			Ndc80			Rpl14	Trbv13-1	Golm1		Cct3	Pfkp	Gm9493	Parp10	Cast	Art2b			GBP4	SLC49A4	Tnfrsf9	Rpl10a	Slc16a6			THAP7	RPL27A		DIP2A			Set	Itgb4
	Thrb	Nfe2	Ckap4	Hmgb2		C20orf160			Nfe2			Il6st	Cox6b1	Cbx7		Smc2	Rhof	Lrig1	Cd69	1810037I17Rik	Stard3nl			ATP6V0A2	CD86	Tnfsf6	Rpl13	Slc7a5			GIMAP2	RPL38		PTPN4
	Tnfsf8	Nhsl2	Clec4e	Asf1b		C20orf6			Nhsl2			Rpl19	Lypla1	Orai2		Apex1	Timp2	Prkca	Sp110	Pdcd10	Mbnl1			STAT1	TIGIT	Tor3a	Rpl22	Spty2d1				IL6ST		KLRF1
	Tpd52	Osbpl3	Clgn	Shcbp1		C20orf72			Osbpl3			Rpl27a	Cap1	Cyth1		Mrpl12	Ndfip2	Rpl27-ps3	Rnf114	Cd247	Aplp1			HSPA5	SIDT1	Trim25	Rpl28	Ssbp2				GAS5-AS1
	Tppp	Pacsin2	Cmklr1	Neil3		C21orf45			Pacsin2			Rcsd1	Gm17018	Limd1		Eif2s1	Mfsd14b	Ptger2	Pik3ap1	Smim24	Gm20069			UCP2	CD200R1	Trim47	Rpl3	Stk17b				RPS24
	Treml2	Pcyt1a	Cnrip1	2810417H13Rik		C2orf29			Pcyt1a			Rps12-ps3	Eif3h	Hdgfl3		Cct8	Stk10	Cd68	Helz2	Osbpl3	Lrrk1			CASP3	ST3GAL6	Tubb2	Rpl8	Tgif1				RPS15A
	Trmt61a	Pde4a	Cntln	Ttk		C2orf31			Pde4a			Rps23	Gsap	Jtb		Prdx1	Fam49a	Ipcef1	Ctss	Cit	Zfp36			CHSY1	HLCS	Wbp5	Rpn2	Tigit				LINC00861
	Tsacc	Pif1	Cntn5	Kif15		C2orf56			Pif1			Rps15a	Atp5l	Nrm		Tipin	Acp5	Immp2l	Znfx1	Plxdc1	Lcp2			LTB	FGFR1OP	Wbscr5	Rps16	Tiparp				RPL39
	Ttc27	Pik3ap1	Coro2a	Anln		C6orf115			Pik3ap1			Rps25	Cdk5rap1	Card6		Prmt1	N4bp1	Rel	Cnp	Myadm	Pelo			PDIA3	HSPA1B	Zfp91	Rps3	Tjp1				RPL28
	Usp53	Pimreg	Cpeb2	Kif23		C6orf139			Pimreg			Rpl7	Eva1b	Gab3		Ddx39	Arpc1b	Tspan31	Gbp8	Degs1	Cd226			GADD45B	HSPA1A		Rps3a	Tnf				SARAF
	Vipr1	Plekhf1	Crip2	Ccnb2		C6orf211			Plekhf1			Thada	Lamtor5	Mical1		Galk1	Capns1	Rnf19a	Casp8	Ggt1	Gm12216			HMGA1	LOC68395		Rps4x	Tnfaip3				RPS7
		Pmaip1	Crmp1	Kif4		C6orf66			Pmaip1			Sptbn1	Vrk3	Bbc3		Asf1b	Car5b	1810041H14Rik	Gm4070	Nrarp	Gimap5			H2-Q4	H2-Q10		Rps7	Tnfrsf1b				TESPA1
		Pon3	Csf1r	Cenpi		C8orf42			Pon3			Ablim1	Ccdc12	B3gnt2		Kpna2	Nod1	Nbdy	Sp100	Gng3	Trav6-7-dv9			NSMAF	NRM		Rps8	Tnfrsf9				RPL27
		Prdm1	Csf2ra	Sgol2		C9orf77			Prdm1			Rpl37a	Mospd3	Cdc34		Hells	Rnf166	Gatsl3	Tor1aip1	Knstrn	Atp6v0a2			DDX5	H2-T22		Satb1	Tra2a				RASGRP2
		Prf1	Cspp1	Cenpl		CA11			Prf1			Rpl23a	Mrpl57	Pdcd4		Odc1	Pxylp1	Hpcal1	9930111J21Rik2		Ppm1b			CBLB	ENPP5		Sema4a	Trib1				LINC01550
		Ptgs1	Ctla4	Exo1		CABLES1			Ptgs1			Gpx1	Tpgs1	Eif4g2		Cks2	Gns	1500011K16Rik	Ifi211		Rnaseh2c			PTPRCAP	BYSL		Sgk	Trp53inp2				RPS11
		Rap2a	Ctsc	Nsl1		CACHD1			Rap2a			Smc4	Mrpl9	Sept1		Eif1ax	Pced1b	Rps27rt	Ddx24		Cd101			TRBC1	TREML2		Shda	Ube2s				RPL26
		Rtl5	Cxcl10	Hmgb3		CACNA2D3			Rtl5			AY036118	Cry1	G0s2		Uhrf1	Fryl	Nudt14	Psmb8		Baiap3			EOMES	NFYA		Siah1a	Vps37b				GIMAP7
		S1pr5	Cxcl2	Cks2		CADPS2			S1pr5			Rps11	Tnfrsf13b	Mknk2		Snrpf	Sptan1		Tmem184b		Tmem135			FAM189B	UNC5CL		Skp1a	Wsb1				RSL1D1
		Selenom	Cxcr5	Prim2		CALB1			Selenom			Chd3	Trappc1	Polr2e		Snu13	Fbxo31		Il12rb1		Cbx4			SPINT2	SATB1		Snrpd3	Xcl1				OXNAD1
		Serpinb1b	C330007P06Rik	Bard1		CALU			Serpinb1b			Dph5	Dok2	Fth1		Cdk4	Matk		Gbp5		Crot			TAPBP	TWSG1		Snx4	Zfand5				LIMD2
		Serpinb9	Cybb	Pask		CARHSP1			Serpinb9			Ass1	Ctsa	Lamp1		Cdk1	Fam69a		Usp25		Nsmaf			SCAF11	LCLAT1		Srpk1	Zfp36l1				SORL1
		Serpinb9b	Cyfip1	Mcm6		CASP3			Serpinb9b			Fam169b	Coro1b	Frmd8		Hspa9	Tmed2		Pla2g16		Rbl2			GIMAP6	XDH		Ss18					UBA52
		Sgo2a	Cyp4f18	Rnpep		CBS			Sgo2a			Atp1b1	H2-Q10	Cdkn1b		Hist1h2ao	Bin1		Trim25		Kcna3			PTK2B	GALM		Stk38					FAU
		Smpdl3b	Cyp4v3	Scyl3		CBX3			Smpdl3b			Sesn1	Bscl2	Nrros		Dbi	Dock5		Hspa5		Cox8a			HNRNPH1	PKDCC		Supt5h					RPS15
		Smtn	Dapk2	Cenpf		CBX5			Smtn			Rpl11	Gnpda1	Mirt1		Pdia6	Ptpn4		Tor1aip2		Foxn3			IFI47	EPAS1		Tex292					PDE3B
		Snx10	Dclk2	Fbxo5		CCAR1			Snx10			Eef1a1	Ufc1	Ankrd44		Alyref	Tyk2		Etnk1		Sec11c			RGS2	TAF4B		Tmc6					EIF2S3
		Socs2	Dclre1c	Fam54a		CCDC5			Socs2			Tpt1	Gnas	Phf21a		Atic	Meis3		Samd9l		H3f3b			GNG2	EGR1		Tubb5					EIF3E
		Sord	Dcun1d4	Tube1		CCKBR			Sord			Mrpl23	Serf2	Cdc42se1		Mt1	Cers2		Uba7		Slc39a6			1110038F14RIK	PRELID2		Tubb5					RPL7A
		Specc1	Dennd5b	Dna2		CCL26			Specc1			Npc2	Sh3bgrl	Wasf2		Hmgb1	Dbndd2		Csrp1		Stk39			GIMAP3	GRAMD3		Ubp1					RPL35
		Stmn1	Derl3	Myb		CCNA2			Stmn1			Rras2	Ssr3	Stim1		Prelid3b	Phf13		Psmb9		Susd3			GPR18	ADRB2		Znrf2					C6orf48
		Styk1	Dhx58	Gm8681		CCNB1			Styk1			Trbv12-1	March2	Abhd8		Serbp1	Zdhhc20		March5		Gadd45b			CHST12	CLCF1							AES
		Syngr3	Dock6	Cdk2		CCNC			Syngr3			Il4ra	Snx4	Gps2		Ssrp1	Lair1		Selenow		Sytl3			H2-T23	TMEM109							EEF2
		Sytl2	Dock7	Hist3h2a		CCRN4L			Sytl2			Rps14	Rpl36al	Polr2a		Eef1g	Hdgfl2		Casp4		Tsc22d4			IL10RA	IFIT1							RPL17
		Tbc1d2	Dpcr1	Gm12260		CCT5			Tbc1d2			Slc17a9	Gm30054	Slc9a7		Hnrnpa3	Ppm1j		Nampt		Cd82			RNF167	PDLIM1							RGS10
		Tmem151a	Dtx3	Aurkb		CCT8			Tmem151a			Rpl24	Ndufb10	Vezf1		Cct2	Sfr1		Tspo		Traf5			RBL2	RRP12							HAPLN3
		Tmem163	Dusp4	Atad5		CD200			Tmem163			Fam78a	Rac1	Diaph1		Eno1	Slc2a3		Mxd1		Lbh			SLC9A3R1	TMEM250-PS							C1orf162
		Tmem37	Dzank1	BC030867		CD24			Tmem37			Fam241a	Polr3c	Elmo1		Cdca7	Ube2d3		Psme1		Chsy1			CRLF2	SLC27A4							HNRNPA1
		Tmprss13	Eaf2	Eme1		CD2AP			Tmprss13			Ccr9	Mpc1	Cd96		Hmgn1	Tmem50a		Arf4		Ubc			CLTA	IER5L							LEF1-AS1
		Trim16	Eea1	Brca1		CD9			Trim16			Naca	Yipf3	Sephs2		Siva1			Adar		Osgin1			DUSP5	PBX3							PPP1R2
		Trim46	Egr1	Tk1		CDA			Trim46			Il27ra	Snapc5	Il10rb		Nop56			Trim34a		Plekhf1			WIPF1	GSN							SLC7A6
		Tspoap1	Ehd4	Ppil5		CDC2			Tspoap1			Socs3	Lime1	Lck		Lyar			Mitd1		Pdgfb			PRDX5	KIF5C							NACA
		Vim	Eif2ak2	Rad51l1		CDC20			Vim			Arhgap15	Ndufa10	Prrc2b		Spc24			Slfn2		Pde7a			HMGN2	LYPD6B							PFDN5
		Wdr95	Eif4e3	Gen1		CDC25A			Wdr95			Bach2	Commd8	Tef		Ebna1bp2			Casp1		Itm2b			RNASEH2C	NR4A2							NAA16
			Endou	Hist1h2ao		CDC6						Klhdc1		Zbtb7a		G3bp1			Tmbim6		Ptprcap			ITM2C	TANK							FBXO32
			Enpp1	LOC100041230		CDC7						Gm8186		Uhrf1bp1l		Rbbp7			Cd86		Lcp1			ROMO1	IFIH1							RPL23A
			Enpp2	Hist1h2ao		CDCA5						St6gal1		Vkorc1		1500009L16Rik			2810474O19Rik		Itk			LBH	STK39							BACH2
			Enpp5	Hist1h4h		CDCA7						Rpl34		Tsnax		Dkc1			Zc3hav1		Srsf5			UBL5	CERS6							RPS27
			Enpp6	Hist1h2af		CDH1						Gm14085		Celf1		Snrpa1			Irf9		Vps37b			CTLA4	PDK1							RASGRF2
			Entpd1	Hist1h2bg		CDH6						Tbxa2r		Slc50a1		Shmt2			Lilr4b		Frmd4b			TNFAIP3	SCRN3							ICAM2
			Eomes	Hist1h2ao		CDT1						Pecam1		Vat1		Hnrnpu			Tnfsf10		Scly			FUS	UBE2L6							TMEM131L
			F10	Hist1h4d		CDYL						Rab3ip		Kif21b		Nop16			Xdh		Map4k1			SYTL3	TRP53I11							SNHG6
			Fabp1	Cks2		CEB1						Itgae		Bcl9l		Nsun2			Asb13		Setbp1			SRSF5	PRR5L							CAMK4
			Fabp4	Dhfr		CEBPZ						Idh2		Wwp1		Rsl1d1			Irf2		Sh2d3c			TAP1	EHD4							TMEM243
			Fabp7	Hist1h2ao		CECR1						Cox7a2l		Map4		Psma4			Sp140		Ildr1			LUC7L2	DUSP2							GPR155
			Faim	Hist1h2an		CECR6						Add1		Sh3gl1		Ndufab1			AW011738		Rnaset2a			FAM49B	SDCBP2							EEF1D
			Fam129a	Hist1h2ao		CENPA						Gm43698		Arhgef1		Ywhae			Cd164		Gimap6			PSTPIP1	ACSS2							ST6GAL1
			Fam185a	Hist1h2ao		CENPE						H2-DMa		Csde1		Cacybp			Irgm2		Ubac2			GIMAP5	GM11454							TNRC6B
			Fam208a	Hist1h4i		CENPF						Zbtb20		Fam58b		Srsf3			Map2k1		Zbtb38			SRRM2	TOX2							TMEM63A
			Fam81a	Hist1h2ao		CENPH						Nsa2		2510039O18Rik		Nudc			Ifi204		Arhgap10			IL16	EYA2							NSUN5P2
			Fam84a	Hist1h2bh		CER1						Myb		Senp6		Fen1			Ms4a6b		Cetn2			TNFRSF1B	ATP9A							SPTBN1
			Fancd2	Hist1h4c		CGI-115						H2-Oa		Pink1		Hnrnpa2b1			Cmtr1		Itih5			PRF1	ZBP1							NUCB2
			Fancd2os	Hist1h2ba		CGI-30						Rapgef4		Tuba1a		Tomm40			Trim14		Srbd1			GIMAP4	SLC17A9							LINC02067
			Faxc	Gmnn		CGI-48						Ikbke		Ttc39c		Rexo2			Ogfr		Cers4			GPX4	PAG1							FTL
			Fcer1g	E2f3		CHAF1A						Utrn		Prkx		Phb2			Pcgf5		Tcirg1			PHF1	TMEM154							SNHG5
			Fgd4	Cenpp		CHAF1B						Skp1a		Ogdh		Snrpa			Slc25a22		Trbv13-2			LRRK1	GPATCH4							PASK
			Fgl2	Hist2h2aa1		CHD1						Klk8		Prune1		Shmt1			Fchsd2		Ptk2b			2010111I01RIK	SEMA4A							MCMDC2
			Fgr	Zfp367		CHEK1						4930523C07Rik		Slc25a51		Tmpo			Hsh2d		Snai3			INPP5D	SYT11							LEPROTL1
			Filip1	Plp2		CHEK2						Usp28		Hnrnpul2		U2af1			Tmem140		Slc9a3r1			TGOLN1	CD160							STK38
			Fn1	Slbp		CHGA						Srpk1		Ppp3ca		Ezh2			Max		Sytl2			LY6E	SLC22A15							RCAN3
			Fpr2	Cdkn3		CHORDC1						Fau		Gss		Rcc1			Trim12a		Trbc1			TUBA4A	SLC16A1							PCED1B
			Fpr3	EG665955		CHST4						Rbm38		Crebrf		Txn1			Nt5c3		Abcg1			NDUFB8	S1PR1							NIPAL3
			Fry	Rnaseh2b		CHST7						Cyb5a		Cmtm6		Myc			Herc3		Lat			IDNK	PRSS12							TOMM7
			Fyn	Pbk		CHST8						Pde4b		Clcf1		Rbmxl1			Mctp2		Lat2			SAMSN1	FAM241A							PNISR
			Gabarapl1	Wdhd1		CIB2						Prrc2c		Tmem131l		Lsm7			Ms4a6d		5830432E09Rik			PRDX6	DNAJB4							NOP53
			Gas7	Cdca2		CISD1						Kif1b		Phf20l1		Mcm4			Ascc3		Camk2n1			BTG1	ST6GALNAC3							NAP1L1
			Gca	Diap3		CKAP2						H2-Ob		Piezo1		Anp32e			Nlrc5		Ica1			GM11808	TOX							PDK1
			Gcnt1	Wdr67		CKAP5						Znrf1		Rasal3		Srsf7			Morc3		Izumo4			CD82	DDX58							EIF3L
			Gfpt1	Cks2		CKMT1						Grcc10		Dnm2		Cdca8			Serpina3f		Gimap4			RSRP1	AQP3							TRAF3IP3
			Gfral	Gtse1		CKS1B						Klf13		Aaed1		Psma7			Keap1		Slc16a6			DOCK10	SIGMAR1							RNF138
			Ggta1	Espl1		CKS2						Tet3		Ugcg		Srsf6			Ap1s3		Fbxo9			IKZF3	RECK							MAPKAPK5-AS1
			Gjb2	Dscc1		CLDN10						Epb41l4aos		Nr3c1		Uchl3			H2-Q4		Slc16a10			IRF2BPL	TRIM14							PRMT2
			Glcci1	Cenpm		CLDN6						Mycbp2		Arl4d		Ppil1			Bcl3		Rpl27			SUPT20	D630039A03RIK							C1orf228
			Glp1r	Polq		CLDN7						Mpp1		Ncald		Snrpe			Phip		Baiap2			BCL2A1B	E130308A19RIK							BTF3
			Gnas	Chaf1b		CLIC4						Txk		Wbp1l		Slc29a1			Fam26f		Abcb1a			STAT3	TLE1							PCED1B-AS1
			Gnb4	Mcm4		CNOT7						Patj		Runx1		Rfc4			Clec2d		Gimap3			MAP4K1	DMRTA1							SRSF6
			Gng3	2610318N02Rik		CNTNAP2						Pag1		B4galnt1		Calr			Dpp4		Ptp4a3			GIMAP8	ZBTB8A							LGALS3BP
			Gngt2	Cdc45l		COBL						Ttc3		Rps6ka3		Hsp90b1			Rbl1		Gnptg			NKTR	CNR2							LUC7L3
			Gnpda2	Atp13a3		COCH						Rps13		Maf1		Ppan			Trim21		Ypel3			AZI2	PLA2G2D							ITGA6
			Gns	Chaf1a		COL18A1						Cd2ap		Brd9		Paics			Svbp		Agfg1			SORL1	ERRFI1							SLC12A7
			Gpd2	Tcf19		COQ3						Smad7		Ppp4r2		Ppid			Rabepk		Aplp2			FUBP1	TNFRSF9							HSP90AB1
			Gpm6a	Sgol1		COX6A1						Atp11b		Syf2		Syncrip			H2-T24		Etv3			CLK1	ISG15							ANP32B
			Gpr137b	Ndc80		CPSF5						Ralgps2		Bnip3l		Hdgf			Snw1		Fam189b			SPCS2	CRMP1							DPH5
			Gpr155	Rab18		CRABP1						Als2cl		Malt1		Ipo5			Gm47242		Aim2			ACAP1	CD38							PRR29
			Gpr52	Rbbp8		CRABP2						Stk4				Hint1			Cntrl		Rftn1			APOBEC3	OCIAD2							CASP6
			Gpr65	Lmnb1		CRKL						Slc12a7				Canx			Sla		Mob3a			IZUMO4	CXCL10							IL6R
			Gprc5a	2610318N02Rik		CRLF1						Nsd3				Mdh2			Pgd		Sash3			AAK1	ANTXR2							MLXIP
			Grb7	Cdc25c		CRMP1						Cd55				Pno1			Parp11		Prmt2			CELF2	GBP10							STX16
			Gsta4	Kif20b		CROP						Trmt1				Rad51			Capza2		Dock10			TMBIM6	GBP6							ZFAS1
			Gvin1	Scd2		CRSP2						Fntb				Rfc5			Icam1		Tmem38b			CSNK1A1	OASL1							C1orf56
			Gxylt1	Incenp		CRYM						Neurl3				Pebp1			Arid5a		Lpar6			RASGRP1	OAS3							EPHX2
			Gzmk	Plp2		CSE1L						Tmie				Cox5a			Sh3glb1		Ubash3a			CIAPIN1	OAS1A							CUL9
			Haus3	Slc43a3		CSRP2						Nsmce1				Fkbp4			Apobec1		Rgs2			EIF4A2	PTPN11							MKRN1
			Hck	Kif18a		CST1						Tec				Gspt1			Laptm4a		Gm29243			INPP4B	TRAFD1							GIMAP1-GIMAP5
			Hdc	Ccdc34		CTBP2						Tcp11l2				Cisd1			Aida		Rnf167			SLC3A2	ADAP1							PRKCA
			Helz2	D2Ertd750e		CTCF						Slc16a5				Fkbp2			Fyb		Cipc			RPS27RT	GPR146							CHMP7
			Herc6	Wdr76		CTH						Gm19705				Psmb5			Setdb2		Lta4h			UBALD2	CYTH3							CDC42SE1
			Hhex	Dut		CTPS2						Foxk1				Timm23			Fam102a		Ddx5			SMAD7	WDR95							MFNG
			Hip1	Gins1		CTSC						Tspan13				Sfxn1			Rab19		Epcam			PELI1	ICA1							ARHGAP15
			H2-Ab1	Mybl2		CTSL2						Ift80				Prpf19			Rab29		Rab8b			RPS6KA1	MDFIC							APEX1
			H2-Eb1	Ube2c		CXADR						Cd79b				Gart			Myd88		Glp1r			ARMC7	PARP12							STMN3
			Hmgb2	Mcm10		CXCL12						Cpm				Cdca3			Snx2		Ubl5			BCL2A1D	PRSS2							GIMAP5
			Hmgn3	Phf19		CXXC6						Smarca2				Clspn			Lgals8		Zwint			EIF5	TRBC1							CRTC3
			Hp	Stk39		CXorf15						Retreg1				Mthfd1			Gadd45g		Slamf1			DNAJB6	EZH2							CIAPIN1
			Hspa13	Oip5		CYP26A1						Slc43a2				Selenoh			Trim26		Unc119			JAK3	TRA2A							DSEL
			Hspa4l	Ncaph		CYP2S1						Ifngr2				Fbxo5			1110038F14Rik		Tmem191c			HIP1	IL12RB2							NPAT
			Hyal2	Ckap2l		DARS2						Cbl				Dtymk			Mrpl30		Suco			STK11	SEMA4F							SMDT1
			Ica1	E2f1		DBC1						Gramd4				Aldoa			Ubald2		Ppp1r18			H2AFJ	USP18							ATP6V1G1
			Idh1	Dsn1		DCAMKL1						Jakmip1				Cct7			Inpp1		Gm16033			SQSTM1	KLRG1							PLSCR3
			Ier5l	Aurka		DCC1						Mettl9				Tpm4			Dbnl		Inpp5b			SLA2	LAG3							LSR
			AI607873	Plk4		DCP2						Prkd2				Tomm5			Tbrg1		Ubb			FAM102A	PTMS							PYCR2
			Ifi204	Hist1h2an		DDX18						Grk6				Bri3bp			H2-K1		Abr			LRP10	TIGAR							EIF4B
			Mnda	Hist2h2aa1		DDX21						Smg1				Ptbp1			Evi2a		Phf1			ITGAL	KLRB1C							SELENOH
			Ifi27l2a	Hist2h2aa1		DDX25						Setx				Nefh			H2-M3		Sla2			TACC1	KLRB1F							SF1
			Ifi44	Hist2h2bb		DDX46						Tanc1				Sdf2l1			Pnpt1		St14			PIK3CD	KLRD1							TMEM256-PLSCR3
			Ifih1	4930422G04Rik		DEK						Elovl5				Plk1			Elf1		Tox4			SETD5	LRP6							HINT1
			Ifit1	H2afz		DEPDC1B						Rere				Lap3			Als2		Rasgrp1			DNAJC3	EMP1							RAPGEF6
			Ifit3	Trim59		DHFR						Ldlrap1				Eif3a			St6galnac4		Eif4e3			BATF	KCNJ8							GPX1
			Ifitm2	Hist2h2aa1		DHFRL1						Gm20324				Ung			B2m		Actr1b			TOMM34	BBC3							GNL3
			Ifitm3	Hist2h2aa1		DHX29						Gm34006				Stip1			Hk1		Wdr6			RUNX3	BCL3							ST13
			Ikbip	Hist2h4		DHX9						Utp14a				Umps			Mvb12a		Gsdmd			SASH3	KLK8							CDK5RAP3
			Ikzf2	Gpsm2		DIAPH2						Snhg12				Cyc1			Cnot6l		Il16			SDF4	RCN3							LEFTY1
			Ikzf3	Rad54b		DIDO1						Grap2				Vdac1			Wipf1		Hnrnph3			FERMT3	FCGRT							SNURF
			Il10	F730047E07Rik		DKC1						Gpr146				Mrpl17			Lpxn		Itpkb			RAPGEF6	TRPM1							43349
			Il10ra	Melk		DKFZP586L0724						Stt3b				Mettl1			Cep57		Ikzf1			GOLGA7	SLCO3A1							FYB1
			Il13ra1	Smc2		DLAT						Fam208b				Uck2			Tbc1d1		Soat2			CTSC	ISG20							PGGHG
			Il15ra	2610002D18Rik		DLG3						F2rl1				Snrpd3			Mgat1		Clta			ICAM1	GM19765							ST3GAL1
			Il21	Gm12387		DLG7						Nme4				Mthfd2			Insl6		Gm11454			CERS4	ART2B							TMEM204
			Il2rb	Cdkn2c		DNA2L						Ikbkb				Gnl3			9930111J21Rik1		Nedd4			44445	TRIM12C							CNST
			Il6	Cdc20		DNAJB6						Zeb1				Rpn1			Tmem192		Foxo3			PDCD6IP	TRIM30D							MGAT4A
			Il7	Atpif1		DNMT3A						Chd4				Rnaseh2b			Ccr5		Acap1			LPXN	TMEM159							SAMHD1
			Ildr1	Hmgn2		DNMT3B						Klf7				Snrpb			Fnbp4		Eif5			HNRNPDL	IL4RA							ESYT2
			Inhba	Cenpa		DPP3						Smim4				Orc6			Stx11		Ggnbp2			GGNBP2	ITGAX							RIC3
			Iqca	Whsc1		DPPA4						Adgrg5				Ndufa12			Usb1		Itpk1			ELF1	UROS							UXS1
			Irak2	Dck		DPYSL3						Trib2				Mrps6			Usf1		AC147041.1			WNK1	GM15483							PSIP1
			Isg15	Pole		DPYSL5						Taf1d				Mrps28			Plgrkt		Crbn			JUNB	IRF7							CEACAM21
			Isg20	Rfc2		DRIM						Gm9844				Psmb6			Vcpip1		Irf2bpl			NLRC5	IFITM10							COX4I1
			Itga2	Brca2		DSG2						Stambpl1				Aurkb			Cysltr2		Tbc1d10c			POLR2M	TSPAN32							ATXN7
			Itgam	Dbf4		DSP						Top2b				Bzw2			Cd53		Aak1			MRFAP1	TDRP							BIRC3
			Itgav	Tyms		DTYMK										Eif3l			H2-D1		Lasp1			TRA2B	CASP3							FXYD5
			Itgb1bp1	Slbp		DUSP16										Psmb2			Fam111a		Ankrd12			MOB3A	ARMC6							ADPRM
			Itgb8	Adap1		DUT										Mrpl20			Ogfrl1		Ube2v1			ITPKB	INPP4B							EIF3F
			Itih5	Lancl2		E2F5										Slbp			Wnk1		Hdhd5			SLC38A1	ADGRG5							CARD10
			Jdp2	Alms1		ECT2										Ddx21			Celf2		C730034F03Rik			DUSP2	ADGRG1							POM121
			Kazald1	Fancd2		EEF1A1										Rpl4			Trim56		Csk			SP110	DISC1							TPP2
			Kcnip3	Foxm1		EEF1E1										Snrpd2			Dopey2		Spcs2			SRSF7	IZUMO1R							MSL3
			Kctd9	Asns		EFCBP1										Uqcc2			Bbx		Irak2			PLAC8	S1PR5							SGTB
			E430025E21Rik	Zc3hav1		EFS										Psma6			Il2rg		Eif4a2			TOB2	ST14							TOB1
			Kif13b	Ezh2		EFTUD1										2700038G22Rik			BC051226		Nmb			ZFP36L2	SLC37A2							NBDY
			Kif5c	Ncapd2		EGFL4										Pdap1			Gm6904		Inpp5d				NRGN							DOCK10
			Klkb1	Rad51ap1		EGLN3										Ruvbl1			Gpr171		Cd72				IL10RA							FBL
			Klrb1b	Hist4h4		EIF1AX										Ccnb1			Lamp2						SEMA7A							LRRN3
			Kynu	Lig1		EIF2S1										Txnl1			Atp10a						ADPGK							MIR5047
			Lag3	Fanci		EIF3S10										Uqcr10			Phyh						AQP9							DMAC1
			Lamp2	5730590G19Rik		EIF3S3										Rrp15			Xrn1						BCL2A1D							SDR39U1
			Lat2	Rrm1		EIF3S6										Psmd7			Zcchc11						PLSCR1							CCDC18-AS1
			Lax1	Wee1		EIF3S9										Hprt			Ranbp2						PLOD2							U2AF1L4
			Lclat1	Ccne1		EIF4A1										Adsl			Ppm1k						CHST2							CA6
			Lcn2	Dub2a		EIF4E										Strap			Gtpbp2						PXYLP1							FAM107B
			Lgals3	Kif22		EIF4EBP1										Slc7a5			Idnk						DUSP7							CLNS1A
			Lgals4	Rfwd3		EIF5B										Sfpq			Grn						EOMES							TRAPPC6A
			Lgalsl	Casp3		ELOVL6										Polr2f			D17Wsu92e						OXSR1							MDN1
			Lilra6	Mt1		ENAH										Marcksl1			Sipa1l1						VIPR1							BEX3
			Lim2	Cenpn		ENO2										Magoh			Pdlim2						CCR2							SLC25A45
			Litaf	Ckap2		ENPP1										Tmem97									NUDT11							CTC1
			Lmo1	Ifi30		EOMES										Timm50									XK							TRNT1
			6330403K07Rik	Hmgn2		EPB41L4B										Lsm6									DYNLT3							EIF4A2
			2610020H08Rik	Rfwd3		EPHA1										Eef1e1									RTL8C							GTF3A
			Lpcat4	Tk1		EPRS										Ptges3									FGF13							COX6C
			Lrrc8c	H2afx		ERBB2										Polr2l									GAB3							CARS
			Lrrk2	D030028M11Rik		ERBP										Mrpl42									CHIC1							GLG1
			Ltf	Wdr51a		ETV1										Fam162a									ITM2A							DARS
			Lyz1	Spc24		ETV4										Pmm1																PLEKHB1
			Mafg	Hmgn2		EXOSC2										Etf1																ATP5L
			Magee1	Zwilch		EXOSC5										Dnajc2																ARGLU1
			Map2	Hmgb3		EXOSC7										Hpf1																SNRK
			Map6	Fancb		EXOSC9										Npm3																HSPD1
			Mcemp1	Plp2		EXTL2										Eif4e																SCML4
			Mdfic	Mbnl3		F2RL1										Metap2																CD8B
			Mef2c	Pola1		FABP5										Dek																PRDX2
			Mef2d	Ercc6l		FALZ										Tacc3																ARHGAP45
			Metrnl	Nsbp1		FAM124A										Ruvbl2																NSMCE1
			Mgst1			FAM131B										P4hb																UBQLN2
			Mkrn2			FAM29A										Rnps1																LARS
			Mlkl			FAM46B										Cfl1																LIMK2
			Mmd			FAM60A										Psma3																UXT
			Mmp8			FAM72A										Ssr2																ANAPC1P1
			Mpeg1			FANCG										Ndufb6																AIF1
			Mpp4			FANCL										Gins2																NCL
			Mrgpra2a			FBXL10										Nucks1																MTERF4
			Mrgpra2b			FBXO5										Anapc5																ANAPC16
			Ms4a1			FCHO1										Prelid1																LINC01089
			Mterf2			FEN1										Cox6a1																UBE2G2
			Mx1			FEZ1										Smarca5																EBLN3P
			Mx2			FGF13										Glrx3																C4orf3
			Mxd1			FGF2										Manf																EIF5A
			Myadm			FGFR1										Cct4
			Mybl1			FGFR3										Usp1
			Myo18b			FGFR4										Atp5a1
			Myo1e			FIGNL1										Aimp2
			Myo1f			FKBP1B										Gcsh
			Myo9a			FKBP3										Rrp1b
			Mzb1			FKBP5										Ndufc2
			Nab1			FKSG14										Pin1
			Naip2			FLJ10036										Slc25a3
			Nap1l3			FLJ10156										Lsm4
			Napsa			FLJ10330										Hat1
			Ncf1			FLJ10378										Fh1
			Ncf2			FLJ10407										Tpx2
			Ncf4			FLJ10534										Wdr43
			Ndfip2			FLJ10700										Rbm3
			Ndnf			FLJ10808										Psmd1
			Neb			FLJ10884										Ak6
			Nenf			FLJ11184										Mat2a
			Nkg7			FLJ12484										Cnbp
			Nlrc5			FLJ12519										Smarcc1
			Nr4a2			FLJ12644										Sigmar1
			Nrep			FLJ12650										Naa10
			Nsmaf			FLJ13842										Eif2s2
			Nuggc			FLJ13909										Ak2
			Nupr1			FLJ20105										Ube2n
			Oas1a			FLJ20171										Cox5b
			Oas1g			FLJ20485										Eprs
			Oas3			FLJ20641										Supt16
			Ociad2			FLJ20674										Nudt5
			Ofd1			FLJ21148										Mrpl54
			Ogfrl1			FLJ21168										U2af2
			Olr1			FLJ21901										Cenpw
			Oosp1			FLJ21908										Atp5o.1
			Oosp2			FLJ21918										Plp2
			Optn			FLJ21924										Naa50
			Gm10081			FLJ22662										Tufm
			Osbpl3			FLJ30046										Dnmt1
			Osr2			FLJ31434										Incenp
			Ostm1			FLJ34633										Gars
			Oxr1			FLJ40432										Trim28
			Pard3b			FNBP1L										Psme3
			Pawr			FNBP3										Nop2
			Pbx3			FOXA3										Tomm20
			Pcgf5			FOXD3										Vdac2
			Pdcd1			FOXN3										Gtpbp4
			Penk			FOXO1										Rrs1
			Perp			FRAS1										Nudt21
			Pex11a			FRAT2										Psmd3
			Pglyrp1			FRSB										Dhfr
			Pgm2l1			FSD1										Idh3a
			Pgrmc2			FUBP1										Ppp1r14b
			Phactr2			FXR1										Hnrnpd
			Phf11a			FZD7										Psme2
			Pi4k2b			G3BP1										Mrpl15
			Pilra			G3BP2										Noc2l
			Pla2g16			GABRA1										Eif4g1
			Plbd1			GABRA5										Phf5a
			Plekhf1			GABRB3										Timm13
			Plgrkt			GAD1										Pdia3
			Plk2			GAJ										Tmem14c
			Plod2			GAL										Nip7
			Plscr1			GALNT1										Kpnb1
			Plscr4			GALNT12										Ctps
			Plxdc1			GAP43										Ube2l3
			Plxdc2			GARNL4										Mrpl18
			Pml			GART										Hmga1
			Poln			GCLC										Eif3i
			Pon3			GCSH										Sdhb
			Pou2af1			GDF3										Grwd1
			Ppfibp1			GEMIN4										Atad3a
			Prdm1			GFPT2										Psmd12
			Prelid2			GJA1										Bzw1
			Prex1			GJA7										Lsm3
			Prg2			GLDC										Rpl7l1
			Prg3			GLI2										Cmtm7
			Prr5l			GLMN										Ftsj3
			Prss2			GLS2										Dpy30
			Ptger2			GMFB										Uqcrq
			Ptger4			GMNN										Ppat
			Ptgs2			GNAL										Chaf1a
			Ptpn13			GNG4										Rpl7a
			Pygl			GNL2										Eif3c
			Rab30			GNL3										Pomp
			Rab39b			GNPTAB										Mrps36
			Raet1e			GPC4										Chchd1
			Ranbp17			GPM6B										Ssb
			Rap1gap2			GPR										Aprt
			Rasgef1a			GPR160										Pbdc1
			Rasgrp3			GPR19										Utp18
			Rassf1			GPR23										Vars
			Rassf4			GPR64										Cdc20
			Rbbp6			GPRC5B										Mtch1
			Renbp			GRB14										Timm17a
			Rgs1			GRB7										Atp5f1
			Rgs16			GRPR										Snrpg
			Rnase6			GRTP1										Hmgb3
			Rnf128			GSG2										Psmb7
			Rsad2			GTF2E1										Cdv3
			Rtp4			GULP1										Zfp593
			Ryk			GYG2										Rbm8a
			S100a11			GYLTL1B										Nop10
			S100a8			H2AFX										Psmc4
			S100a9			HA-1										Nans
			Samsn1			HAS3										Psma5
			Sccpdh			HDAC2										Tars
			Scd1			HELLS										Exosc8
			Scly			HESX1										Rcl1
			Sec11c			HEY2										Cdc6
			Sec24a			HIP1										Txn2
			Sec24d			HIST1H2BG										Smc1a
			2026-09-04			HIST1H4K										Swi5
			Serp1			HLTF										Atp5j
			Serpinb10			HMBS										Polr2h
			Serpini1			HMGA1										Eif3d
			Setbp1			HMGB2										Farsb
			Sfmbt1			HMGB3										Ybx3
			Sgk1			HMGN2										Isyna1
			Sgpp2			HMMR										Mrps18b
			Sh2d1b1			HNRNPA1										Dynll1
			Sh2d7			HNRNPL										Psmd6
			Sh3yl1			HNRPAB										Ddx39b
			Sirpa			HNRPU										Ppih
			Sirpb1a			HOMER1										Raly
			Sirpb1b			HOOK1										Wdr18
			Slc22a15			HPCL2										Get4
			Slc25a24			HPRP8BP										Psmb4
			Slc27a4			HPS3										Rars
			Slco4c1			HRASLS3										Abce1
			Slpi			HRMT1L3										Hist1h2an
			Snrpn			HSD11B2										Sssca1
			Snurf			HSD17B4										Llph
			Sostdc1			HSP90B1										Pum3
			Sp140			HSPA14										Lrrc59
			Spin4			HSPA4										Eif4a3
			Spry2			HSPA8										Kif11
			Srgap3			HSPA9B										Srsf1
			Srxn1			HSPC111										Cs
			St6galnac3			HSPC163										Got2
			Stat3			HSPD1										Dazap1
			Stk3			HSPE1										Fubp1
			Stk32c			HT017										Prim1
			Stk39			HTR1D										Rpf2
			Strn			Hs.105196										Psmc5
			Stx19			Hs.173497										Hist1h3b
			Stx7			Hs.178761										Hmbs
			Sun1			Hs.40154										Sae1
			Suox			Hs.60548										Rfc3
			Suv39h2			ID1										Anapc15
			Sv2c			IDH1										Mybl2
			Syk			IFI30										Ola1
			Syt11			IFITM1										Hnrnpdl
			Tap1			IGF2BP3										Brix1
			Tas2r144			IGFBP2										Uqcrc1
			Tbc1d12			IL17RD										Fignl1
			Wbp5			ILF3										Psma1
			Tcf4			IMP-1										Gsto1
			Tec			IMP-2										Tcf19
			Thbd			IMPA1										Chchd10
			Thbs1			IMPA2										Ndufb8
			Themis2			IMPDH2										Snrpc
			Tifa			INDO										Glrx5
			Tigit			IPO7										Ddx27
			Tjp2			IPO9										Hnrnpf
			Tk1			IQGAP2										Psma2
			Tlr2			IRX2										Psmd13
			Tmem106a			ITGA6										Mrpl36
			Tmem140			ITGB1BP3										Ccdc86
			Tmem159			ITGB5										Pold2
			Tmem163			ITPR3										Mrpl28
			Tmem170b			ITSN1										Hirip3
			Tmem2			JARID2										Slc25a4
			Tmem263			JMJD1C										Wdr75
			Tmprss13			JMY										Eif3g
			Tnfrsf13c			KAL1										Ndufv2
			Tnfrsf17			KCNK5										Ostc
			Tnfsf13b			KCNN2										Smyd2
			Tnfsf4			KCNQ2										Grpel1
			Tnip3			KCNS3										Tcerg1
			Topors			KCTD14										Stoml2
			Tor1aip1			KIAA0007										Fkbp1a
			Tox			KIAA0020										Rsl24d1
			Tox2			KIAA0101										Ifrd2
			Trafd1			KIAA0114										Psmd11
			Tram2			KIAA0153										Uchl5
			Trdn			KIAA0179										Timm9
			Trem1			KIAA0483										Uqcr11
			Treml4			KIAA0523										Eif6
			Trib1			KIAA0650										Lsm12
			Trmt61b			KIAA0888										Ccne1
			Trpc1			KIAA0922										Bola3
			Trps1			KIAA1274										Dars
			Tsga10			KIAA1287										Atpif1
			Tstd3			KIAA1553										Hnrnpc
			Ttn			KIAA1576										Ddost
			Twsg1			KIAA1712										Uba2
			Txn1			KIAA1727										Mrps7
			Ubash3b			KIAA1982										Wdr12
			Gm16039			KIF1A										Cenps
			Unc93b1			KIF20A										Knl1
			Vamp8			KIF23										Nono
			Vcan			KIF2C										Pfdn6
			Vmp1			KIF4A										Noc4l
			Vps54			KIF5C										Gpatch4
			Vsig1			KIFC2										Vdac3
			Xaf1			KLHL7										Ncaph
			Xcl1			KLKB1										Pabpc4
			Xdh			KNTC1										Mrpl51
			Zak			KNTC2										Mbd3
			Zbed3			KPNA2										Ndufa4
			Zbp1			KRR1										Bcat1
			Zbtb38			KRT18										Pdcd5
			Zc2hc1a			KRT8										Nudcd2
			Zc3h12c			KRTCAP3										Ndufs8
			Zcrb1			LAPTM4B										Chaf1b
			Zfand4			LARP7										Mtap
			Zmat1			LARS										Psmd14
			Zfp619			LARS2										Nifk
			Zfp382			LCK										Esco2
			Clec4a1			LDB2										Atp5g2
			Zfp772			LECT1										Parp1
			Zpbp			LEFTY1										Cdc45
			1700009P17Rik			LEFTY2										Fus
			2010309G21Rik			LGALS1										Rpa3
			2610524H06Rik			LGALS8										Psmb3
			2810047C21Rik1			LGR4										Timm10
			4930447A16Rik			LIG1										Isy1
			6330407A03Rik			LIN28										Nup85
			9130019P16Rik			LINGO1										Prdx2
			9430025C20Rik			LISCH7										Ndufaf4
			9430069I07Rik			LMNB1										Tardbp
			A430093F15Rik			LMNB2										Snrnp40
			A530032D15Rik			LNK										Hdac2
			A530040E14Rik			LOC112885										Nubp1
			Acaa1b			LOC134492										Eloc
			Art2a-ps			LOC138255										Srsf10
			B930095G15Rik			LOC144097										Eif4h
			C130026I21Rik			LOC157627										Tomm70a
			Ccl6			LOC400451										Minos1
			Chil3			LOC90806										Bsg
			Chil6			LPAAT-e										Ppm1g
			Clec4a3			LPHN2										Gadd45gip1
			Csprs			LRIG1										Pes1
			Ear1			LRP8										St13
			Ear10			LRRN1										Rad51ap1
			Ear12			LSM5										Etfb
			Ear2			LSM6										Ndufb2
			Ear3			LSM7										Mydgf
			Ear6			LUC7L										Memo1
			Ear7			LYAR										Psmd2
			F630003A18Rik			LYPLA1										Dera
			F730043M19Rik			M6PR										Timeless
			Gm10389			MAD2L2										Rrp1
			Gm10484			MAL2										Prmt3
			Gm10759			MAN2A1										Sdhd
			Gm10850			MAP4K1										Trp53
			Gm12250			MAP7										Rrp9
			Gm12253			MARS										Pole4
			Gm156			MARVELD2										Ncbp2
			Gm16932			MARVELD3										Emc8
			Gm3604			MASTL										Rbbp4
			Gm4070			MAT2A										Cenpm
			Gm4841			MAT2B										Fam136a
			Gm4956			MATK										Psmc2
			Gm597			MATR3										Mad2l1
			Gm6377			MBD2										Kdelr2
			Gm7609			MCL1										Gps1
			Gm8979			MCM10										Sumo2
			Gm8989			MCM2										Smco4
			Gm9733			MCM3										Hist1h1a
			Gm9917			MCM4										Nup43
			Gpr137b-ps			MCM5										Elavl1
			I830012O16Rik			MCM6										Acp1
			Ifitm6			MCM7										Ahsa1
			Igh-V7183			MDN1										Cotl1
			Igh-VJ558			MEST										Clns1a
			Igh-VS107			METAP1										Cox7b
			Igh-VX24			METTL3										Rfc2
			Igha			METTL8										Hnrnpl
			Ighg			MFAP2										Pmf1
			Ighg3			MFAP3L										Ddx1
			Ighm			MFGE8										Atp5d
			Ighv1-26			MGC10911										Wdr77
			Ighv1-53			MGC10993										Gmps
			Ighv1-72			MGC13096										Ltv1
			Ighv14-2			MGC19531										Taf10
			Ighv5-9			MGC24665										Prdx3
			Igj			MGC2574										Hnrnpk
			Igk-V1			MGC2603										Btf3
			Igk-V21			MGC3101										Chchd4
			Igk-V28			MGC42530										Cdca5
			Igkc			MGC45866										Naa15
			Igkj1			MGC72075										Mpp6
			Igkv1-117			MGC8407										Magohb
			Igkv10-96			MGC8685										Nup93
			Igkv19-93			MGEA5										Syce2
			Igkv4-55			MGST1										Cad
			Igkv4-59			MICB										Rangap1
			Igkv4-68			MIZ1										Abcf2
			Igkv4-70			MKI67IP										Cbx5
			Igkv4-80			MLF1IP										Cops6
			Igkv4-91			MLLT10										Ndufc1
			Igkv5-43			MLSTD1										Immt
			Igkv6-14			MMP1										Tubg1
			Igkv6-15			MMP25										Fxn
			Igkv6-20			MOSC1										Nars
			Igkv6-23			MRE11A										Pop5
			Igkv8-30			MRPL1										Pgp
			Igkv9-120			MRPL11										Cox7a2
			Iglc1			MRPL12										Hsd17b12
			Iglv1			MRPL15										Prep
			Iglv2			MRPL37										Cdk2ap1
			Klra10			MRPL42										Exosc7
			Klra19			MRPS30										Tsr1
			Klra3			MRPS9										Eif5b
			Klra5			MRS2L										Hist1h2bj
			Klra6			MSH2										Hist1h4i
			Klra9			MSH6										Ckap2l
			Klre1			MT1F										Rwdd1
			Lgals6			MT1H										Ndufa11
			LOC100038947			MT1X										Txnl4a
			LOC433053			MTA3										Creld2
			LOC435333			MTB										Hmmr
			LOC677008			MTF2										Tuba4a
			Mcpt8			MTHFD1										Cinp
			Mela			MTHFD2										Sf3b4
			Mir21a			MTIF2										Hdlbp
			Naip5			MYB										Mphosph10
			Naip6			MYBL2										Prpf40a
			Naip7			MYC										E2f1
			Ngp			MYCN										Shcbp1
			Olfr120			MYEF2										Smarcb1
			Olfr497			MYL7										Agpat5
			Olfr629			MYO10										Kif15
			Pira11			MYO5C										Lsm5
			Pira6			MYOHD1										Pus1
			Pira7			MYRIP										Pold1
			Prl3d1			MYST2										Rfc1
			Prl3d2			NALP2										Tbrg4
			Prl3d3			NANOG										Timm8b
			Raet1a			NAP1L1										Wdr4
			Raet1b			NAP1L2										Bcl7c
			Raet1d			NAP1L3										Thop1
			Serpina3f			NARG1										Eftud2
			Serpina3g			NARG2										Maz
			Tcrg-V1			NASP										Mrpl13
			Tcrg-V4			NBR2										Smyd5
			Tcrg-V6			NCL										Mrps12
			Trem3			NCOA6IP										Ppif
			Trgv2			NCRMS										Ncapg
			Trim30d			NDUFA4										1810022K09Rik
			Usp17la			NEFL										Tcof1
			V165-D-J-C mu			NFE2L3										Mrpl35
			Wfdc18			NFYB										Uqcrb
			Wfdc21			NIPBL										Mt3
			Zfp808			NIPSNAP1										Hspbp1
			Zfp934			NLGN4X										Ndufb7
			Zfp935			NLGN4Y										Gtf3a
			Zfp939			NLN										Uqcrfs1
						NME1										Hist1h2ag
						NME2										Ndufs6
						NMU										Tbl3
						NOC3L										E2f4
						NODAL										Pbk
						NOL5A										Fcf1
						NOLA3										Cbx1
						NOLC1										Ddx18
						NOVA1										Ncapd2
						NP										Rad23b
						NPM1										Bop1
						NPM3										Hspa4
						NPTX2										Sec13
						NR6A1										Fdps
						NSD1										Ewsr1
						NTHL1										Eif1a
						NTS										Eef1d
						NUBP1										Chchd2
						NUCKS1										Etfa
						NUDT1										Noa1
						NUDT15										Pfdn4
						NUDT5										Coq7
						NUFIP1										Atp5j2
						NUP107										Ubl4a
						NUP160										Adrm1
						NUP205										Slc19a1
						NUP35										Pus7
						NUP37										Larp7
						NUP54										Mak16
						NUP62										Mrpl40
						NUP88										Sf3a3
						NUSAP1										Rpn2
						OAZ2										Adh5
						OAZIN										Eif3j1
						OCLN										9130401M01Rik
						OIP5										Slc25a39
						OLFM1										Nelfe
						ORC1L										Hist2h2ac
						ORC2L										Tdg
						ORC3L										Cisd3
						OSBPL9										Luc7l3
						OTX2										Tsfm
						PAI-RBP1										Utp4
						PAICS										Ppp5c
						PAK1										Caprin1
						PAK1IP1										Alad
						PANK2										Wdr83os
						PARP1										Tmem238
						PASK										Dck
						PAWR										Cops3
						PAXIP1L										Sumo3
						PBEF1										Actl6a
						PBX1										Hspa14
						PCDH1										Lsm8
						PCNA										Mtch2
						PCNT1										Pola1
						PDCD2										Ska1
						PDE6G										Ddx56
						PDE9A										Prim2
						PDK1										Hdac1
						PDPN										Psmc3
						PDZK4										Exosc3
						PFAS										Wdr46
						PFDN4										Serp1
						PFN1										Sf3b5
						PGK1										Rrp7a
						PGM1										Psmc6
						PHF17										Bccip
						PHIP										Mthfd1l
						PIF1										Trmt6
						PIG8										Ergic1
						PIGW										Hnrnpm
						PIK3CB										Gusb
						PIM1										Mrpl21
						PIM2										Carnmt1
						PIPOX										Prmt7
						PITPNC1										Bub3
						PITX2										Rnf126
						PKD2										Ino80e
						PKP4										Park7
						PLA2G3										Utf1
						PLCB3										Dnajb11
						PLCL2										Ipo7
						PLK4										Aen
						PLP1										Psmg1
						PLS1										Uqcrc2
						PLS3										Cdk2
						PMAIP1										Mrps5
						PNMT										Sdad1
						PNN										Mrps33
						PODXL										Thoc7
						POLA										Srrt
						POLD1										Ccdc124
						POLE2										Zmynd19
						POLR1B										Nol11
						POLR2D										Rnpep
						POLR3G										Mtx2
						POLR3K										Ilf2
						POU2F1										Smarca4
						POU5F1										Trap1
						PPAP2A										Trip13
						PPAP2C										Yif1b
						PPAT										Dscc1
						PPM1B										Ndufa5
						PPP1CC										Tra2b
						PPP1R16B										Pycrl
						PPP1R1A										Dcun1d5
						PPP2R1B										Pwp1
						PPP2R2B										Cyb5b
						PRDM14										Mrps10
						PRDX1										Polr3k
						PRDX2										Elob
						PRIM1										Hist2h2bb
						PRIM2A										Cdca7l
						PRKAA2										Polr2c
						PRKCB1										Vcp
						PRKCI										Fam96a
						PRKCQ										Ssbp1
						PRKDC										Sms
						PRKX										Ddb1
						PRODH										Acsl5
						PROM1										Pusl1
						PRPS1										Mrps14
						PRR6										Mad2l2
						PSIP1										Cd3eap
						PSMA2										Csnk2b
						PSMA3										Bcap29
						PSME3										Trbv29
						PTBP1										Ndufb9
						PTK7										M6pr
						PTPN2										E2f8
						PTPRG										Cse1l
						PTPRZ1										Thyn1
						PTTG1										Nob1
						PUNC										Srsf9
						PUS1										Pdia4
						PVRL3										Commd1
						PWP2H										Wdr36
						PYCR2										Comt
						Pfs2										Rcc2
						RAB3B										Smn1
						RABGAP1L										Blmh
						RAD51										Atad5
						RAD51AP1										Nol12
						RAD54B										Ppie
						RAM2										Rpa1
						RAMP										Baz1b
						RANBP5										Cops5
						RARRES2										Lman2
						RASL11B										Samm50
						RBBP6										Rbm17
						RBBP8										Farsa
						RBM13										2810004N23Rik
						RBM14										Hmgn5
						RBM28										Gsr
						RBM39										Btf3l4
						RBPMS2										Mrpl11
						RBPSUH										Mrps18a
						RECQL										Ptpa
						REPRIMO										Aurka
						RET										Zdhhc2
						RFC2										Sf3a2
						RFC3										Alg8
						RFC4										Tex30
						RFC5										Pfdn1
						RGMA										Ncbp1
						RGS17										Bysl
						RIF1										Tma16
						RMI1										Cdca4
						RNASEH2A										Vma21
						RNF12										Erg28
						RNF125										Usp10
						RNF138										Sarnp
						RNF41										Mrpl27
						RNMT										Pole2
						RNU3IP2										Klhdc4
						ROBO1										Atp5c1
						ROR1										Hars
						RPA3										Wdr5
						RPL12										Dynll2
						RPL24										Usmg5
						RPL39L										Nxt1
						RPL4										Ndufv1
						RPL6										Fasn
						RPL7										Gtf2h5
						RPLP0										Nup62
						RPS19										Ccdc34
						RPS2										1110008F13Rik
						RPS24										Heatr1
						RRAS2										Prmt5
						RRM1										Ube2v2
						RRM2										Mrpl16
						RRS1										Bub1b
						RUVBL1										Nup37
						SACS										Cpsf2
						SALL1										Psmc1
						SALL2										Sap18
						SALL3										Dis3
						SALL4										Hnrnpr
						SCG3										Nmral1
						SCGB3A2										Morf4l2
						SCLY										Dbf4
						SCNN1A										Dnajc19
						SEC22C										Hist1h3c
						SEC5L1										Cdca2
						SEMA3A										Emd
						SEMA4C										Nle1
						SEMA5B										Polr3h
						SEMA6A										Abcf1
						SENP3										Ncapg2
						SEPHS1										Mrps24
						SERPINB9										Ccnf
						SERPINH1										Cpox
						SET										Nsd2
						SF3A1										Eif2b3
						SFRP1										Dnaja1
						SFRP2										Ube2a
						SFRS1										Drg1
						SFRS11										Wdr61
						SFRS18										Prelid2
						SFRS7										Suclg1
						SIAT1										Topbp1
						SIL										Rpia
						SILV										Mlec
						SIP										Pola2
						SIRT1										Kif20a
						SKIL										Naf1
						SKP2										Ndufs3
						SLC13A3										Ppp1cc
						SLC16A1										Fdx1l
						SLC1A5										Nat10
						SLC25A29										Imp4
						SLC29A1										Hsph1
						SLC29A2										Prpf31
						SLC2A3										Emg1
						SLC38A1										Kti12
						SLC39A10										Isoc1
						SLC3A2										Kifc1
						SLC4A11										Higd1a
						SLC5A6										Pfdn2
						SLC6A8										Ap1s1
						SLC7A3										Trmt61a
						SLC7A8										Prps1
						SLD5										Cdc123
						SMARCA5										Rbx1
						SMC2L1										Pole3
						SMC6L1										Rabggtb
						SMS										Fkbp3
						SNRPA										Gtf2f2
						SNRPA1										Zfp706
						SNRPD2										Tsn
						SNRPD3										Nudt19
						SNRPF										Yrdc
						SNRPN										Cenph
						SNTB1										Usp14
						SORD										Kars
						SORL1										2010107E04Rik
						SOX11										Arpp19
						SOX2										Metap1
						SOX3										Usp39
						SPAG5										Cdc37
						SPRY1										Cyp51
						SPRY4										Aunip
						SRP72										Tmem147
						SRRM1										Mrps17
						SS18L2										Mrpl45
						SSB										Epop
						SSBP1										Spcs3
						STC1										Thoc6
						STRBP										Mrpl19
						SUPT16H										Tfrc
						SWAP70										Psmg4
						SYNCOILIN										Idi1
						SYNGR3										Top1
						SYT6										Eny2
						Spc25										Rmi2
						TA-LRRP										Rnf7
						TA-PP2C										Pinx1
						TACC3										Surf2
						TACSTD1										Psmg2
						TAF4B										A430005L14Rik
						TAF9L										Ube2e3
						TARS										Aco2
						TCEA1										Dcaf13
						TCF7L1										Idh3g
						TD-60										Sar1a
						TDGF1										1190007I07Rik
						TEAD4										Rtn3
						TEBP										Sf3b6
						TERF1										Dph3
						TFAM										Suz12
						TFAP2C										Plk4
						TFRC										Nt5c3b
						TGIF										Arl1
						THOC1										Rif1
						THRAP6										Polr2d
						THY1										Eif3m
						THY28										Sec61a1
						TIA1										Nubp2
						TIMP4										Rangrf
						TIPIN										Tmed10
						TK1										Dhx9
						TKT										Ddx10
						TMEFF1										Cenpk
						TMPO										Nup107
						TMSL8										Eri1
						TNFRSF8										2210016F16Rik
						TNNI3										Gfer
						TNNT1										Atad2
						TNPO1										Gins1
						TNPO3										Ssr1
						TNRC9										Prdx4
						TOMM40										Mars
						TOP2A										Gm16286
						TPD52										Pop1
						TPM1										Aatf
						TPM3										Uba1
						TPT										Psmc3ip
						TPX2										Zranb2
						TRA16										Luc7l
						TRERF1										Smc3
						TRIM14										Ndufb5
						TRIM2										Gemin6
						TRIM22										Pold3
						TRIM24										Tbl1x
						TRIM36										Exosc5
						TRIP8										Yars2
						TSC										Amd1
						TTC19										Ssr4
						TTF2										Lman1
						TTK										Gm10282
						TUBA1										Emc6
						TUBB										Dctd
						TUBB2										Mdn1
						TUBB6										Cep83
						TXNDC										Them6
						UACA										Xrcc6
						UBA2										Eif2b1
						UBE1C										Bud23
						UBE2C										Yars
						UCHL1										Ncaph2
						UGCGL1										Pla2g12a
						UGP2										Haus1
						UGT8										Cdt1
						UNC5D										Spc25
						UNG										Rae1
						UNQ470										Pam16
						UQCRH										Tmem167
						USO1										Znhit6
						USP1										Poc1a
						USP28										Snhg6
						USP32										Xpnpep1
						USP44										Mtdh
						USP46										Adss
						USP9X										Sac3d1
						USP9Y										Aarsd1
						UTF1										Nop9
						VANGL2										Pelp1
						VBP1										Asf1a
						VENTX2										Thoc3
						VRK1										Ccnh
						VSNL1										Cmss1
						WBSCR16										Rad23a
						WBSCR17										Mrfap1
						WDHD1										Pnp
						WDR12										Azin1
						WDR3										Pole
						WDR4										Akr1b3
						WDR9										Api5
						WDSOF1										Mrpl49
						WFDC2										Cbfb
						XPO1										Jpt2
						XRCC5										Polr2j
						YBX2										Nuf2
						YTHDF2										Wdr3
						ZBTB3										Kpna3
						ZD52F10										Ivns1abp
						ZFP42										Pdk3
						ZIC2										Nek2
						ZIC3										Mapk6
						ZNF117										Rpp30
						ZNF146										Ndufa8
						ZNF195										Suv39h1
						ZNF198										Stt3a
						ZNF257										Fam60a
						ZNF267										Polr1b
						ZNF273										Romo1
						ZNF281										Ndc80
						ZNF331										Mrpl55
						ZNF398										Endog
						ZNF43										Slc43a3
						ZNF447										Mtx1
						ZNF505										Itpa
						ZNF518										Myg1
						ZNF553										Gnl2
						ZNF567										CAAA01147332.1
						ZNF588
						ZNF589
						ZNF614
						ZNF638
						ZNF770
						ZRF1
						ZSCAN10

## Sheet: Sheet2
AIMP2	BYSL	CBX3	CDK4	DCTPP1	DDX18	DUSP2	EXOSC5	FARSA	GNL3	GRWD1	HK2	HSPD1	HSPE1	IMP4	IPO4	LAS1L	MAP3K6	MCM4	MCM5	MPHOSPH10	MRTO4	MYBBP1A	MYC	NDUFAF4	NIP7	NOC4L	NOLC1	NOP16	NOP2	NOP56	NPM1	PA2G4	PES1	PHB1	PLK1	PLK4	PPAN	PPRC1	PRMT3	PUS1	RABEPK	RCL1	RRP12	RRP9	SLC19A1	SLC29A2	SORD	SRM	SUPV3L1
			AIMP2
			BYSL
			CBX3
			CDK4
			DCTPP1
			DDX18
			DUSP2
			EXOSC5
			FARSA
			GNL3
			GRWD1
			HK2
			HSPD1
			HSPE1
			IMP4
			IPO4
			LAS1L
			MAP3K6
			MCM4
			MCM5
			MPHOSPH10
			MRTO4
			MYBBP1A
			MYC
			NDUFAF4
			NIP7
			NOC4L
			NOLC1
			NOP16
			NOP2
			NOP56
			NPM1
			PA2G4
			PES1
			PHB1
			PLK1
			PLK4
			PPAN
			PPRC1
			PRMT3
			PUS1
			RABEPK
			RCL1
			RRP12
			RRP9
			SLC19A1
			SLC29A2
			SORD
			SRM
			SUPV3L1
			TBRG4
			TCOF1
			TFB2M
			TMEM97
			UNG
			UTP20
			WDR43
			WDR74
[truncated: 8 more columns]
