# Supplementary material for: Single-cell gain-of-function mapping reveals latent regulatory programs governing CD8+ T cell fate
Source: Research Square preprint supplement (doi:10.21203/rs.3.rs-9929244/v1), 2026-06-11
Supplement: Supplementary file 2 [file 8e033a04203dc59e68a22e6e.xlsx]

## Sheet: Sheet1
	ORF GOF improved T cell number in cancer and infection context.						ORF GOF prevented T cell exhaustion in cancer and infection context.						ORF GOF improved T cell stemness in cancer and infection context.
	B cell acute leukemia	B16 Melanoma	KPC Pancereatic cancer	LCMV Clone 13 chonic viral infection	LCMV Armstrong Acute viral infection		B cell acute leukemia	B16 Melanoma	KPC Pancereatic cancer	LCMV Clone 13 chonic viral infection	LCMV Armstrong Acute viral infection		B cell acute leukemia	B16 Melanoma	KPC Pancereatic cancer	LCMV Clone 13 chonic viral infection	LCMV Armstrong Acute viral infection
	Myc	Jun	Batf	Myc	Runx1		Pou2f2	Ahr	Eomes	Klf2	Spi1		Esrrb	Nr3c1	Rara	Egr3	Pou2f2
	Jun	Batf	Jun	Runx1	Batf		Dppa2	Pparg	Rara	Runx3	Hhex		Myc	Ahr	Pou2f2	Myc	Bach2
	Runx1	Runx1	Yy1	Nanog	Runx3		Rarb	Gabpa	Myc	Hhex	Pax5		Satb1	Gabpa	Myc	Atf3	Hhex
	Nr0b1	Yy1	Tox	Batf	Ppard		Runx3	Nr3c1	Klf2	Atf3	Ppara		Nrf1	Eomes	Ppard	Foxp3	Egr3
	Tox	Hdgf	Hdgf	Atf3	Atf3		Satb1	Esrrb	Trp53	Ppara	Egr3		Rarg	Myc	Trp53	Nanog	Zscan12
	Hmgb2	Ppard	Runx1	Ppard	Mxd3		Nr1h3	Myc	Pou2f2	Myc	Sox5		Fli1	Gatad2a	Tcf7	Nr1h3	Myc
	Batf	Tbx21	Myc	Bcl6	Tbx21		Runx1	Klf2	Foxp3	Bach2	Satb1		Runx1	Gatad2b	Arnt2	Satb1	Nanog
	Yy1	Myc	Tfap4	Tbx21	Tfap4		Cggbp1	Prdm1	Nr1h3	Tcf7	Bach2		Gabpa	Hmgxb4	Hmgxb4	Tox	Nfil3
	Runx3	Runx2	Tbx21				Tbx21	Zfp296	Gata2	Runx1	Cebpa		Nr1h3	Tfap4	Nfil3	Bcl6	Runx1
	Tfap4	Tfap4	Dppa2				Gabpa	Tcf7	Runx3	Rxra	Zbtb7b		Creb3l2	Dppa2	Nanog	Tfap4	Satb1
	Dppa2	Runx3	Gatad2a				Pparg	Nr1h3	Mxd3	Nr1h3	Myc		Cggbp1	Tbx21	Nrf1	Ppara	Sox5
	Tbx21		Hmgb2				Rarg	Creb3l2	Atf3	Tfap4	Foxp3		Pparg	Mxd3	Gatad2a	Trp53	Runx3
	Runx2		Creb3l2				Yy1	Dppa2	Tbx21	Foxp3	Nanog		Runx3	Esrrb	Tox		Esrrb
	Hdgf		Nr1h3				Creb3l2	Nr0b1	Nrf1	Tox	Atf3		Rarb	Nr0b1	Gatad2b		Atf3
	Atf3		Arnt2				Ppard	Eomes	Nr0b1	Pax5	Klf2		Runx2		Atf3		Eomes
	Nr1h3		Cggbp1				Fli1	Hmgxb4	Creb3l2	Nanog	Tox		Yy1		Zfp296		Trp53
	Gabpa		Runx2				Tcf7	Cggbp1	Cggbp1	Tbx21	Batf		Hdgf		Runx3		Pax5
	Cggbp1		Trp53				Myc	Tbx21	Nanog	Trp53	Hhex		Oct4		Yy1
			Tcf7					Tfap4	Tcf7	Pou2f2	Pax5		Tox		Tfap4
			Mxd3						Jun	Ppard	Ppara		Tfap4		Cebpa
			Zfp512						Hdgf		Nr1h3		Gatad2a		Nr1h3
			Nr0b1						Runx1		Pou2f2		Hmgb2		Nr0b1
			Sox5						Tox		Egr3		Nr3c1
			Gatad2b						Tfap4		Eomes		Tbx21
			Runx3								Tcf7		Mlxipl
			Atf3								Zscan12		Zfp281
			Ppard										Tcf7
													Mxd3
													Rxra
													Eomes
													Arnt2
													Dppa2
													Jun
													Trp53
													Nanog
													Prdm1
													Hmgxb4
													Foxp3
