# Supplementary material for: Single-cell gain-of-function mapping reveals latent regulatory programs governing CD8+ T cell fate
Source: Research Square preprint supplement (doi:10.21203/rs.3.rs-9929244/v1), 2026-06-11
Supplement: Supplementary file 3 [file af9e5c548390e33007008c45.xlsx]

## Sheet: LCMV
LCMV ORF library Input Transduction Efficiency			LCMV scGOF-seq Output Normalized to Input				LCMV scGOF-seq Output ORF/Cntrl FoldChange
ORF	Transduction		ORF	LCMV_Acute	LCMV_Chronic		ORF	LCMV_Acute	LCMV_Chronic
Atf3	18.14		Atf3	0.00804955	0.0053891		Atf3	2.22205	1.8871
Bach2	5.32		Bach2	0.0011214	0.000373801		Bach2	0.309559	0.130894
Batf	2.28		Batf	0.021835	0.00771943		Batf	6.02747	2.70312
Bcl6	12.98		Bcl6	0	0.00381807		Bcl6	0	1.33697
Cebpa	22.88		Cebpa	0.000799722	0		Cebpa	0.220761	0
Crem	3.36		Crem	ND	ND		Crem	ND	ND
Egr3	5.06		Egr3	0.000196044	0.000196044		Egr3	0.0541172	0.0686487
Eomes	14.2		Eomes	0.00204745	0.00149621		Eomes	0.565191	0.523929
Esrrb	12.58		Esrrb	0.000988592	0		Esrrb	0.272898	0
FoxP3	18.22		Foxp3	0.000266447	0.000444078		Foxp3	0.0735517	0.155503
Hhex	34.64		Hhex	2.9e-05	2.9e-05		Hhex	0.00800415	0.0101534
Klf2	35.18		Klf2	0.00107087	5.79e-05		Klf2	0.295609	0.0202695
Klf4	10.4		Klf4	0	0.00021778		Klf4	0	0.0762602
Mlxipl	7.42		Mlxipl	0	0.00112941		Mlxipl	0	0.395488
Mxd3	33.9		Mxd3	0.00711062	0.00224177		Mxd3	1.96286	0.785002
Myc	26.04		Myc	0.00171293	0.0107284		Myc	0.472849	3.75675
Nanog	17.42		Nanog	0.000678365	0.00801704		Nanog	0.18726	2.80733
Nfil3	7.14		Nfil3	0.000269408	6.74e-05		Nfil3	0.0743692	0.0235847
Nr1h3	11.48		Nr1h3	7.68e-05	0.000614155		Nr1h3	0.0211919	0.215059
Nr3c1	23.3		Nr3c1	0.000305276	0		Nr3c1	0.0842704	0
Pax5	18.6		Pax5	5.5e-05	5.5e-05		Pax5	0.0151838	0.0192609
Pou2f2	3.78		Pou2f2	0.000229231	0.000802309		Pou2f2	0.0632785	0.280945
Pou5f1	12.6		pou5f1	ND	ND		pou5f1	ND	ND
Ppara	2.46		Ppara	0.000247018	0.000988073		Ppara	0.0681886	0.345994
Ppard	3.36		Ppard	0.00808857	0.0044776		Ppard	2.23282	1.56792
Pparg	3.6		Pparg	0	0.000283252		Pparg	0	0.0991866
Prdm1	21.22		prdm1	ND	ND		prdm1	ND	ND
Runx1	4.92		Runx1	0.0225176	0.0083363		Runx1	6.21591	2.91913
Runx3	19.21		Runx3	0.00903454	0.000361382		Runx3	2.49396	0.126545
Rxra	16.52		Rxra	0.000822243	0.000822243		Rxra	0.226977	0.287925
Satb1	5.86		Satb1	0.000357973	0.000447467		Satb1	0.0988174	0.15669
Sox2	18.93		sox2	ND	ND		sox2	ND	ND
Sox5	3.98		Sox5	0.000759489	0.000455693		Sox5	0.209654	0.15957
Spi1	16.88		Spi1	0.000110233	0		Spi1	0.0304295	0
Tbx21	36.07		Tbx21	0.0065397	0.00305594		Tbx21	1.80526	1.0701
Tcf7	16.42		Tcf7	0.000445127	0.000890253		Tcf7	0.122876	0.31174
Tfap4	21.58		Tfap4	0.00378496	0.00164829		Tfap4	1.04482	0.577181
Tox	9.6		Tox	0.00139696	0.00237483		Tox	0.385626	0.831594
Trp53	14.14		Trp53	0.00170612	0.00156394		Trp53	0.470968	0.547645
Zbtb7b	23.34		Zbtb7b	0.000795844	0		Zbtb7b	0.21969	0
Zscan12	6.24		Zscan12	0.000377011	0.000150804		Zscan12	0.104073	0.0528072
Ctrl-EGFR DIII - DIV	20.03		Ctrls	0.00362257	0.00285575		Ctrls	1	1
Ctrl-DTR	11.48
Ctrl-mKO2	12.57
Ctrl-Thy1.1	21.91

## Sheet: Cancer
LCMV ORF library Input Transduction Efficiency			Cancer scGOF-seq Output Normalized to Input					Cancer scGOF-seq Output ORF/Cntrl FoldChange
ORF	Transduction		ORF	ALL	B16	KPC		ORF	ALL	B16	KPC
Ahr	8.1		Ahr	0	2.26585e-05	0		Ahr	0	0.469258	0
Arnt2	40		Arnt2	0.000151596	1.6844e-05	2.24587e-05		Arnt2	0.702886	0.34884	1.61003
Atf3	77.5		Atf3	0.000387998	2.21713e-05	1.55199e-05		Atf3	1.79898	0.459168	1.1126
Bach2	22.3		Bach2	0	7.32098e-06	7.32098e-06		Bach2	0	0.151617	0.524829
Batf	81		Batf	0.000670394	0.00140783	0.00088641		Batf	3.10833	29.1561	63.5454
Bcl6	34.5		bcl6	ND	ND	ND		Bcl6	ND	ND	ND
Cebpa	53		Cebpa	0	0	7.13788e-06		Cebpa	0	0	0.511704
Cggbp1	75.3		Cggbp1	0.000248614	3.27843e-05	2.18562e-05		Cggbp1	1.15272	0.678962	1.56684
Creb312	77.8		Creb3l2	0.000172822	1.46047e-05	2.43412e-05		Creb3l2	0.801302	0.302463	1.74498
Crem	50.4		Crem	ND	ND	ND		Crem	ND	ND	ND
Ctcf	3.52		Ctcf	ND	ND	ND		Ctcf	ND	ND	ND
Dppa2	61.4		Dppa2	0.000576181	3.14853e-05	3.46338e-05		Dppa2	2.6715	0.652061	2.48285
Egr3	17.4		Egr3	0	0	1.03462e-05		Egr3	0	0	0.741705
Eomes	71.3		Eomes	4.02474e-05	9.46998e-06	2.3675e-06		Eomes	0.18661	0.196123	0.169722
Essrb	74.9		Esrrb	3.10453e-06	3.10453e-06	0		Esrrb	0.0143944	0.0642949	0
Fli1	50.9		Fli1	1.73471e-05	0	0		Fli1	0.0804307	0	0
Foxp3	27.4		Foxp3	8.32684e-05	1.28105e-05	6.40526e-06		Foxp3	0.386079	0.265306	0.459183
Gabpa	34.6		Gabpa	0.000255131	1.21491e-05	1.21491e-05		Gabpa	1.18293	0.251607	0.870948
Gata2	73.3		Gata2	0	0	2.44828e-06		Gata2	0	0	0.175513
Gatad2a	40.4		Gatad2a	0.000144727	1.80909e-05	3.1659e-05		Gatad2a	0.671036	0.374662	2.26958
Gatad2b	23		Gatad2b	0.000156776	7.83882e-06	1.56776e-05		Gatad2b	0.726904	0.162342	1.12391
Hdgf	74.9		Hdgf	0.000432512	0.000102979	6.69365e-05		Hdgf	2.00537	2.1327	4.79857
Hhex	82.4		hhex	ND	ND	ND		Hhex	ND	ND	ND
Hmgd2	49.1		Hmgb2	0.00100238	2.87421e-05	2.87421e-05		Hmgb2	4.64761	0.595249	2.06048
Hmgxb4	30.2		Hmgxb4	0.000170634	6.31979e-06	1.26396e-05		Hmgxb4	0.791157	0.130883	0.906112
Jun	58.6		Jun	0.0029588	0.00213691	0.000603617		Jun	13.7187	44.2554	43.2723
Klf2	73.9		Klf2	3.44089e-06	6.88178e-06	3.44089e-06		Klf2	0.0159539	0.142522	0.246672
Klf4	59.6		klf4	ND	ND	ND		Klf4	ND	ND	ND
Mlixpl	30.8		Mlxipl	9.20221e-05	0	0		Mlxipl	0.426667	0	0
Morc3	3.25		morc3	ND	ND	ND		Morc3	ND	ND	ND
Mxd3	59.9		Mxd3	0.000117835	2.42602e-05	1.73287e-05		Mxd3	0.546351	0.502429	1.24227
Myc	73		Myc	0.00765132	7.10311e-05	5.64606e-05		Myc	35.4759	1.47105	4.04757
Nanog	72.7		Nanog	0.000116243	8.30306e-06	2.76769e-06		Nanog	0.538968	0.171956	0.198411
Nfil3	35.6		Nfil3	9.76752e-06	4.88376e-06	9.76752e-06		Nfil3	0.0452877	0.101143	0.700218
Nfr1	32		Nr0b1	0.00134331	3.68418e-05	1.70039e-05		Nr0b1	6.22834	0.762994	1.21898
Nr0b1	69.8		Nr1h3	0.000257858	1.71905e-05	2.29207e-05		Nr1h3	1.19557	0.356015	1.64315
Nr1h3	35.9		Nr3c1	5.83341e-05	3.43142e-06	0		Nr3c1	0.27047	0.0710647	0
Nr3c1	59.6		Nrf1	1.63531e-05	0	5.45104e-06		Nrf1	0.0758223	0	0.390776
Pax5	41.1		pax5	ND	ND	ND		Pou5f1	0.422672	0	0
Pou2f2	65.6		Pou2f2	2.36966e-05	1.77724e-05	5.92415e-06		Pax5	ND	ND	ND
Pou5f1	55.5		Pou5f1	9.11605e-05	0	0		Pou2f2	0.109871	0.368067	0.424693
Ppara	15.6		Ppara	7.08575e-05	0	0		Ppara	0.328535	0	0
Ppard	30.7		Ppard	0.000182143	8.09525e-05	1.51786e-05		Ppard	0.844518	1.67652	1.08813
Pparg	67.4		Pparg	1.64022e-05	4.68634e-06	0		Pparg	0.0760498	0.097054	0
Prdm1	50.8		Prdm1	3.7358e-06	1.8679e-05	0		Prdm1	0.0173213	0.386842	0
Rara	75.2		Rara	0	0	4.54155e-06		Rara	0	0	0.325577
Rarb	70.7		Rarb	0.000192635	8.95976e-06	0		Rarb	0.893164	0.185557	0
Rarg	76.3		Rarg	2.3703e-05	0	0		Rarg	0.1099	0	0
Runx1	50.8		Runx1	0.00267046	0.000356546	6.54881e-05		Runx1	12.3818	7.38407	4.69474
Runx2	33.9		Runx2	0.000438622	7.03961e-05	2.16603e-05		Runx2	2.0337	1.4579	1.5528
Runx3	64.9		Runx3	0.000632062	6.52957e-05	1.5671e-05		Runx3	2.9306	1.35227	1.12343
Rxra	69.2		Rxra	6.31698e-05	1.05283e-05	0		Rxra	0.292891	0.218041	0
Satb1	20.4		Satb1	2.57998e-05	0	0		Satb1	0.119622	0	0
Sox2	62.6		sox2	ND	ND	ND		Sox2	ND	ND	ND
Sox5	22.4		Sox5	0	2.38764e-05	1.59176e-05		Sox5	0	0.49448	1.14111
Spi1	57.3		spi iso 2	ND	ND	ND		Spi1	ND	ND	ND
Tbx21	63.5		Tbx21	0.000469932	8.09328e-05	4.17718e-05		Tbx21	2.17887	1.67612	2.99455
Tcf7	65		Tcf7	0.000211602	1.76335e-05	1.76335e-05		Tcf7	0.981108	0.36519	1.26412
Tfap4	55.1		Tfap4	0.000617565	6.74934e-05	5.06201e-05		Tfap4	2.86338	1.39779	3.62887
Tox	42.4		Tox	0.00100599	3.21918e-05	0.00023339		Tox	4.66435	0.666691	16.7314
Trp53	43		Trp53	8.87078e-05	3.73507e-05	1.86753e-05		Trp53	0.4113	0.773532	1.33881
YY1	58.7		Yy1	0.000656652	0.000198523	0.000238227		Yy1	3.04461	4.11141	17.0781
Zbtb7b	60.2		zbtb7b	ND	ND	ND		Zbtb7b	ND	ND	ND
Zfp281	29.2		zfp143	ND	ND	ND		Zfp143	ND	ND	ND
Znf143	3.46		Zfp281	4.03487e-05	0	0		Zfp281	0.187079	0	0
Znf296	72		Zfp296	6.8237e-06	4.54913e-06	1.36474e-05		Zfp296	0.0316385	0.0942125	0.978361
Znf512	23.8		Zfp512	1.72893e-05	0	1.72893e-05		Zfp512	0.080163	0	1.23944
Zscan12	24.6		Zscan12	4.21521e-05	8.43041e-06	8.43041e-06		Zscan12	0.195441	0.174594	0.604363
Ctrl-DTR	37.3		Ctrls	0.000215677	4.82859e-05	1.39493e-05		Ctrls	1	1	1
Ctrl-EGFR	61.1
Ctrl-NGFR	49.2
Ctrl-Thy1.1	62.1
Ctrl-mko2	50.8
